# Supplementary material for: Genus Smenospongia: Untapped Treasure of Biometabolites—Biosynthesis, Synthesis, and Bioactivities
Source: MDPI journal article supplement (doi:10.3390/molecules27185969), 2022-09-14
Supplement: s1 [file s1]

## Supplementary Materials

Review

# Genus *Smenospongia*: Untapped Treasure of Biometabolites—Biosynthesis, Synthesis, and Bioactivities

Sabrin R. M. Ibrahim <sup>1,2,\*</sup>, Sana A. Fadil <sup>3</sup>, Haifa A. Fadil <sup>4</sup>, Rawan H. Hareeri <sup>5</sup>, Hossam M. Abdallah <sup>3,6</sup> and Gamal A. Mohamed <sup>3</sup>

<sup>1</sup> Department of Chemistry, Preparatory Year Program, Batterjee Medical College, Jeddah 21442, Saudi Arabia

<sup>2</sup> Department of Pharmacognosy, Faculty of Pharmacy, Assiut University, Assiut 71526, Egypt

<sup>3</sup> Department of Natural Products and Alternative Medicine, Faculty of Pharmacy, King Abdulaziz University, Jeddah 21589, Saudi Arabia

<sup>4</sup> Department of Clinical and Hospital Pharmacy, Faculty of Pharmacy, Taibah University, Almadinah Almunawarah 30078, Saudi Arabia

<sup>5</sup> Department of Pharmacology and Toxicology, Faculty of Pharmacy, King Abdulaziz University, Jeddah 21589, Saudi Arabia

<sup>6</sup> Department of Pharmacognosy, Faculty of Pharmacy, Cairo University, Cairo 11562, Egypt

\* Correspondence: sabrin.ibrahim@bmc.edu.sa; Tel.: +966-581183034

**Table S1.** Indole derivatives reported from genus *Smenospongia*.

| Compound Name                                                      | Source                   | Place                                                                          | Mol. Wt. | Mol. Formula                                                   | Ref.    |
|--------------------------------------------------------------------|--------------------------|--------------------------------------------------------------------------------|----------|----------------------------------------------------------------|---------|
| Indole-3-carbaldehyde (1)                                          | <i>Smenospongia</i> sp.  | South side of Porpoise Cay, Queensland, Australia                              | 145      | C <sub>9</sub> H <sub>7</sub> NO                               | [20]    |
|                                                                    | <i>S. cerebriiformis</i> | Vinhmoc, Quangtri, Vietnam                                                     | -        | -                                                              | [63]    |
|                                                                    | <i>Smenospongia</i> sp.  | South side of Porpoise Cay, Queensland, Australia                              | -        | -                                                              | [20]    |
|                                                                    | <i>S. cerebriiformis</i> | Vinhmoc, Quangtri, Vietnam                                                     | -        | -                                                              | [63]    |
| 3-Carboxylindole (2)                                               | <i>S. aurea</i>          | Discovery Bay, Jamaica                                                         | 161      | C <sub>9</sub> H <sub>7</sub> NO <sub>2</sub>                  | [20]    |
| Indole-3-carboxylic methyl ester (3)                               | <i>S. cerebriiformis</i> | Vinhmoc, Quangtri, Vietnam                                                     | 175      | C <sub>10</sub> H <sub>9</sub> NO <sub>2</sub>                 | [63]    |
| 5-Bromo-1 <i>H</i> -indole-3-carboxaldehyde (4)                    | <i>Smenospongia</i> sp.  | PP Island, Andaman Sea, Krabi province, Thailand                               | 222      | C <sub>9</sub> H <sub>6</sub> BrNO                             | [14]    |
| 5-Bromo-1 <i>H</i> -indole-3-carboxylic acid (5)                   | <i>Smenospongia</i> sp.  | Batanes, Philippines                                                           | 238      | C <sub>9</sub> H <sub>6</sub> BrNO <sub>2</sub>                | [19]    |
| 6-Bromo-1 <i>H</i> -indole-3-carboxaldehyde (6)                    | <i>Smenospongia</i> sp.  | South side of Porpoise Cay, Queensland, Australia                              | 222      | C <sub>9</sub> H <sub>6</sub> BrNO                             | [20]    |
|                                                                    | <i>Smenospongia</i> sp.  | PP Island, Andaman Sea, Krabi province, Thailand                               | 222      | C <sub>9</sub> H <sub>6</sub> BrNO                             | [14]    |
| 5,6-Dibromo-1 <i>H</i> -indole-3-carboxaldehyde (7)                | <i>Smenospongia</i> sp.  | PP Island, Andaman Sea, Krabi province, Thailand                               | 300      | C <sub>9</sub> H <sub>5</sub> Br <sub>2</sub> NO               | [14]    |
| 6-Bromo-1 <i>H</i> -indole-3-carboxylic acid methyl ester (8)      | <i>S. aurea</i>          | Milne Bay region, Papua New Guinea                                             | 252      | C <sub>10</sub> H <sub>8</sub> BrNO <sub>2</sub>               | [22]    |
|                                                                    | <i>Smenospongia</i> sp.  | PP Island, Andaman Sea, Krabi province, Thailand                               | -        | -                                                              | [14]    |
| 5-Bromo-1 <i>H</i> -indole-3-carboxylic acid methyl ester (9)      | <i>Smenospongia</i> sp.  | PP Island, Andaman Sea, Krabi province, Thailand                               | 252      | C <sub>10</sub> H <sub>8</sub> BrNO <sub>2</sub>               | [14]    |
| 5,6-Dibromo-1 <i>H</i> -indole-3-carboxylic acid methyl ester (10) | <i>Smenospongia</i> sp.  | PP Island, Andaman Sea, Krabi province, Thailand                               | 330      | C <sub>10</sub> H <sub>7</sub> Br <sub>2</sub> NO <sub>2</sub> | [14]    |
| 6-Bromo-1 <i>H</i> -indol-3-yl)acetic acid methyl ester (11)       | <i>S. aurea</i>          | Milne Bay region, Papua New Guinea                                             | 266      | C <sub>11</sub> H <sub>10</sub> BrNO <sub>2</sub>              | [22]    |
| Tryptamine (12)                                                    | <i>Smenospongia</i> sp.  | South side of Porpoise Cay, Queensland, Australia                              | 160      | C <sub>10</sub> H <sub>7</sub> N                               | [20]    |
| <i>N,N</i> -Dimethyltryptamine (13)                                | <i>S. aurea</i>          | Discovery Bay, Jamaica                                                         | 188      | C <sub>12</sub> H <sub>12</sub> N <sub>2</sub>                 | [18]    |
| 5-Bromo- <i>N,N</i> -dimethyltryptamine (14)                       | <i>S. echina</i>         | -Puerto Morelos, Mexico<br>-Glover and Lighthouse Reefs, Belize, Caribbean Sea | 266      | C <sub>12</sub> H <sub>15</sub> BrN <sub>2</sub>               | [15]    |
|                                                                    | <i>S. aurea</i>          | -Puerto Morelos, Mexico<br>-Glover and Lighthouse Reefs, Belize, Caribbean Sea | -        | -                                                              | [15,16] |
|                                                                    | <i>S. aurea</i>          | San Salvador Island coasts                                                     | -        | -                                                              | [34]    |
|                                                                    | <i>S. aurea</i>          | Florida Keys, USA                                                              | -        | -                                                              | [17]    |
| 5,6-Dibromotryptamine (15)                                         | <i>Smenospongia</i> sp.  | Batanes, Philippines                                                           | 315      | C <sub>10</sub> H <sub>10</sub> Br <sub>2</sub> N <sub>2</sub> | [19]    |
|                                                                    | <i>Smenospongia</i> sp.  | PP Island, Andaman Sea, Krabi province, Thailand                               | 315      | C <sub>10</sub> H <sub>10</sub> Br <sub>2</sub> N <sub>2</sub> | [14]    |
| 5,6-Dibromo- <i>N</i> -methyltryptamine (16)                       | <i>Smenospongia</i> sp.  | PP Island, Andaman Sea, Krabi province, Thailand                               | 329      | C <sub>11</sub> H <sub>12</sub> Br <sub>2</sub> N <sub>2</sub> | [14]    |
| 5,6-Dibromo- <i>N,N</i> -dimethyltryptamine (17)                   | <i>S. echina</i>         | -Puerto Morelos, Mexico<br>-Glover and Lighthouse Reefs, Belize, Caribbean Sea | 343      | C <sub>12</sub> H <sub>14</sub> Br <sub>2</sub> N <sub>2</sub> | [15,16] |
|                                                                    | <i>S. echina</i>         | -Puerto Morelos, Mexico<br>-Glover and Lighthouse Reefs, Belize, Caribbean Sea | -        | -                                                              | [15]    |

|                                                                |                         |                                                       |     |                                                                               |      |
|----------------------------------------------------------------|-------------------------|-------------------------------------------------------|-----|-------------------------------------------------------------------------------|------|
|                                                                | <i>S. aurea</i>         | Glover and Lighthouse Reefs,<br>Belize, Caribbean Sea | -   | -                                                                             | [16] |
|                                                                | <i>S. aurea</i>         | San Salvador Island coasts                            | -   | -                                                                             | [34] |
|                                                                | <i>S. aurea</i>         | Florida Keys, USA                                     | -   | -                                                                             | [17] |
| 5,6-Dibromo- <i>N</i> -formyltryptamine (18)                   | <i>Smenospongia</i> sp. | PP Island, Andaman Sea, Krabi<br>province, Thailand   | 343 | C <sub>11</sub> H <sub>10</sub> Br <sub>2</sub> N <sub>2</sub> O              | [14] |
| 5,6-Dibromo- <i>N</i> -acetyltryptamine (19)                   | <i>Smenospongia</i> sp. | PP Island, Andaman Sea, Krabi<br>province, Thailand   | 357 | C <sub>12</sub> H <sub>12</sub> Br <sub>2</sub> N <sub>2</sub> O              | [14] |
| 5,6-Dibromo- <i>N</i> -acetyl- <i>N</i> -methyltryptamine (20) | <i>Smenospongia</i> sp. | PP Island, Andaman Sea, Krabi<br>province, Thailand   | 371 | C <sub>13</sub> H <sub>14</sub> Br <sub>2</sub> N <sub>2</sub> O              | [14] |
| 5-Bromo-L-tryptophan (21)                                      | <i>Smenospongia</i> sp. | Batanes, Philippines                                  | 282 | C <sub>11</sub> H <sub>11</sub> BrN <sub>2</sub> O <sub>2</sub>               | [19] |
| 5-Bromoabrine (22)                                             | <i>Smenospongia</i> sp. | Batanes, Philippines                                  | 296 | C <sub>12</sub> H <sub>13</sub> BrN <sub>2</sub> O <sub>2</sub>               | [19] |
| 5,6-Bibromoabrine (23)                                         | <i>Smenospongia</i> sp. | Batanes, Philippines                                  | 373 | C <sub>12</sub> H <sub>12</sub> Br <sub>2</sub> N <sub>2</sub> O <sub>2</sub> | [19] |
| Makaluvamine O (24)                                            | <i>S. aurea</i>         | Discovery Bay, Jamaica                                | 265 | C <sub>10</sub> H <sub>7</sub> BrN <sub>2</sub> O <sub>2</sub>                | [18] |
|                                                                | <i>Smenospongia</i> sp. | Batanes, Philippines                                  | -   | -                                                                             | [19] |
|                                                                | <i>S. aurea</i>         | Florida Keys, USA                                     | -   | -                                                                             | [17] |
| 1,2-Bis(1 <i>H</i> -indol-3-yl)ethane-1,2-dione (25)           | <i>Smenospongia</i> sp. | South side of Porpoise Cay,<br>Queensland, Australia  | 288 | C <sub>18</sub> H <sub>12</sub> N <sub>2</sub> O <sub>2</sub>                 | [20] |

**Table S2.** Biological activity of reported metabolites from genus *Smenospongia*.

| Compound Name                                                                                        | Biological Activity | Assay/Organism or Cell Line       | Biological Results          |                                         | Ref. |
|------------------------------------------------------------------------------------------------------|---------------------|-----------------------------------|-----------------------------|-----------------------------------------|------|
|                                                                                                      |                     |                                   | Compound                    | Positive Control                        |      |
| 5,6-Dibromo-1 <i>H</i> -indole-3-carboxylic acid methyl ester (10)                                   | Cytotoxicity        | MTT/HepG2                         | 36.1 µM (IC <sub>50</sub> ) | Doxorubicin 0.69 µM (IC <sub>50</sub> ) | [14] |
| 5,6-Dibromotryptamine (15)                                                                           | Cytotoxicity        | MTT/HCT-116 (P <sup>53+/+</sup> ) | 12.6 µM (IC <sub>50</sub> ) | Etoposide 3.4 µM (IC <sub>50</sub> )    | [19] |
|                                                                                                      |                     | MTT/HCT-116 (P <sup>53-/-</sup> ) | 53.2 µM (IC <sub>50</sub> ) | Etoposide 17 µM (IC <sub>50</sub> )     | [19] |
|                                                                                                      |                     | MTT/HCT-116 (P21 <sup>+/+</sup> ) | 85 µM (IC <sub>50</sub> )   | Etoposide 3.4 µM (IC <sub>50</sub> )    | [19] |
|                                                                                                      |                     | MTT/HCT-116 (P21 <sup>-/-</sup> ) | 63 µM (IC <sub>50</sub> )   | Etoposide 26 µM (IC <sub>50</sub> )     | [19] |
|                                                                                                      |                     | MTT/MOLT-3                        | 5.4 µM (IC <sub>50</sub> )  | Etoposide 0.03 µM (IC <sub>50</sub> )   | [14] |
|                                                                                                      |                     | MTT/HepG2                         | 23.1 µM (IC <sub>50</sub> ) | Doxorubicin 0.69 µM (IC <sub>50</sub> ) | [14] |
|                                                                                                      |                     | MTT/A549                          | 78.6 µM (IC <sub>50</sub> ) | Doxorubicin 0.43 µM (IC <sub>50</sub> ) | [14] |
|                                                                                                      |                     | MTT/HuCCA-1                       | 23.6 µM (IC <sub>50</sub> ) | Doxorubicin 0.69 µM (IC <sub>50</sub> ) | [14] |
|                                                                                                      |                     | MTT/HeLa                          | 9.4 µM (IC <sub>50</sub> )  | Doxorubicin 0.38 µM (IC <sub>50</sub> ) | [14] |
|                                                                                                      |                     | MTT/MDA-MB-231                    | 34.1 µM (IC <sub>50</sub> ) | Doxorubicin 0.62 µM (IC <sub>50</sub> ) | [14] |
| 5,6-Dibromo- <i>N</i> -methyltryptamine (16)                                                         | Cytotoxicity        | MTT/MOLT-3                        | 46.1 µM (IC <sub>50</sub> ) | Etoposide 0.03 µM (IC <sub>50</sub> )   | [14] |
|                                                                                                      |                     | MTT/HepG2                         | 23.1 µM (IC <sub>50</sub> ) | Doxorubicin 0.69 µM (IC <sub>50</sub> ) | [14] |
|                                                                                                      |                     | MTT/A549                          | 78.3 µM (IC <sub>50</sub> ) | Doxorubicin 0.43 µM (IC <sub>50</sub> ) | [14] |
|                                                                                                      |                     | MTT/HuCCA-1                       | 54.2 µM (IC <sub>50</sub> ) | Doxorubicin 0.69 µM (IC <sub>50</sub> ) | [14] |
|                                                                                                      |                     | MTT/HeLa                          | 52.7 µM (IC <sub>50</sub> ) | Doxorubicin 0.38 µM (IC <sub>50</sub> ) | [14] |
|                                                                                                      |                     | MTT/HL-60                         | 14.6 µM (IC <sub>50</sub> ) | Etoposide 1.18 µM (IC <sub>50</sub> )   | [14] |
|                                                                                                      |                     | MTT/MDA-MB-231                    | 35.8 µM (IC <sub>50</sub> ) | Doxorubicin 0.62 µM (IC <sub>50</sub> ) | [14] |
| Makaluvamine O (24)                                                                                  | Cytotoxicity        | MTT/HCT-116 (P <sup>53+/+</sup> ) | 71 µM (IC <sub>50</sub> )   | Etoposide 3.4 µM (IC <sub>50</sub> )    | [19] |
|                                                                                                      |                     | MTT/HCT-116 (P <sup>53-/-</sup> ) | 79 µM (IC <sub>50</sub> )   | Etoposide 17 µM (IC <sub>50</sub> )     | [19] |
|                                                                                                      |                     | MTT/HCT-116 (P21 <sup>+/+</sup> ) | 94 µM (IC <sub>50</sub> )   | Etoposide 3.4 µM (IC <sub>50</sub> )    | [19] |
|                                                                                                      |                     | MTT/HCT-116 (P21 <sup>-/-</sup> ) | 8.6 µM (IC <sub>50</sub> )  | Etoposide 26 µM (IC <sub>50</sub> )     | [19] |
| (R and S) of 5'-[(5,6-Dibromo-1 <i>H</i> -indol-3-yl)methyl]-3'-methylimidazolidine-2',4'-dione (36) | Cytotoxicity        | MTT/MOLT-3                        | 47.3 µM (IC <sub>50</sub> ) | Etoposide 0.03 µM (IC <sub>50</sub> )   | [14] |
|                                                                                                      |                     | MTT/HepG2                         | 31.2 µM (IC <sub>50</sub> ) | Doxorubicin 0.69 µM (IC <sub>50</sub> ) | [14] |
|                                                                                                      |                     | MTT/A549                          | 84.8 µM (IC <sub>50</sub> ) | Doxorubicin 0.43 µM (IC <sub>50</sub> ) | [14] |
|                                                                                                      |                     | MTT/HuCCA-1                       | 87.3 µM (IC <sub>50</sub> ) | Doxorubicin 0.69 µM (IC <sub>50</sub> ) | [14] |
|                                                                                                      |                     | MTT/HeLa                          | 59.9 µM (IC <sub>50</sub> ) | Doxorubicin 0.38 µM (IC <sub>50</sub> ) | [14] |

|                                          |                   |                                   |                                           |                                                     |      |
|------------------------------------------|-------------------|-----------------------------------|-------------------------------------------|-----------------------------------------------------|------|
| 5,6-Dibromo-2'-demethylaplysinopsin (37) | Cytotoxicity      | MTT/HeLa                          | 13.0 $\mu\text{M}$ (IC <sub>50</sub> )    | Doxorubicin 0.38 $\mu\text{M}$ (IC <sub>50</sub> )  | [14] |
|                                          |                   | MTT/MOLT-3                        | 36.5 $\mu\text{M}$ (IC <sub>50</sub> )    | Etoposide 0.03 $\mu\text{M}$ (IC <sub>50</sub> )    | [14] |
|                                          |                   | MTT/HepG2                         | 37.7 $\mu\text{M}$ (IC <sub>50</sub> )    | Doxorubicin 0.69 $\mu\text{M}$ (IC <sub>50</sub> )  | [14] |
|                                          |                   | MTT/A549                          | 96.7 $\mu\text{M}$ (IC <sub>50</sub> )    | Doxorubicin 0.43 $\mu\text{M}$ (IC <sub>50</sub> )  | [14] |
|                                          |                   | MTT/HuCCA-1                       | 89.2 $\mu\text{M}$ (IC <sub>50</sub> )    | Doxorubicin 0.69 $\mu\text{M}$ (IC <sub>50</sub> )  | [14] |
|                                          |                   | MTT/HeLa                          | 75.4 $\mu\text{M}$ (IC <sub>50</sub> )    | Doxorubicin 0.38 $\mu\text{M}$ (IC <sub>50</sub> )  | [14] |
|                                          |                   | MTT/HL-60                         | 27.0 $\mu\text{M}$ (IC <sub>50</sub> )    | Etoposide 1.18 $\mu\text{M}$ (IC <sub>50</sub> )    | [14] |
| Aureol (58)                              | Cytotoxicity      | MTT/MDA-MB-231                    | 42.7 $\mu\text{M}$ (IC <sub>50</sub> )    | Doxorubicin 0.62 $\mu\text{M}$ (IC <sub>50</sub> )  | [14] |
|                                          |                   | MTT/HCT-116 (P <sup>53+/+</sup> ) | 15.9 $\mu\text{M}$ (IC <sub>50</sub> )    | Etoposide 3.4 $\mu\text{M}$ (IC <sub>50</sub> )     | [19] |
|                                          |                   | MTT/HCT-116 (P <sup>53-/-</sup> ) | 41 $\mu\text{M}$ (IC <sub>50</sub> )      | Etoposide 17 $\mu\text{M}$ (IC <sub>50</sub> )      | [19] |
|                                          |                   | MTT/HCT-116 (P21 <sup>+/+</sup> ) | 73 $\mu\text{M}$ (IC <sub>50</sub> )      | Etoposide 3.4 $\mu\text{M}$ (IC <sub>50</sub> )     | [19] |
|                                          |                   | MTT/HCT-116 (P21 <sup>-/-</sup> ) | 61 $\mu\text{M}$ (IC <sub>50</sub> )      | Etoposide 26 $\mu\text{M}$ (IC <sub>50</sub> )      | [19] |
|                                          |                   | MTT/Hepa59T/VGH                   | 5.77 $\mu\text{g/mL}$ (IC <sub>50</sub> ) | Mitomycin 0.1 $\mu\text{g/mL}$ (IC <sub>50</sub> )  | [36] |
|                                          |                   | MTT/KB                            | 4.94 $\mu\text{g/mL}$ (IC <sub>50</sub> ) | Mitomycin 0.1 $\mu\text{g/mL}$ (IC <sub>50</sub> )  | [36] |
|                                          |                   | MTT/Hela                          | 7.65 $\mu\text{g/mL}$ (IC <sub>50</sub> ) | Mitomycin 0.11 $\mu\text{g/mL}$ (IC <sub>50</sub> ) | [36] |
|                                          |                   | MTT/MOLT-3                        | 24.8 $\mu\text{M}$ (IC <sub>50</sub> )    | Etoposide 0.03 $\mu\text{M}$ (IC <sub>50</sub> )    | [14] |
|                                          |                   | MTT/HepG2                         | 29.2 $\mu\text{M}$ (IC <sub>50</sub> )    | Doxorubicin 0.69 $\mu\text{M}$ (IC <sub>50</sub> )  | [14] |
|                                          |                   | MTT/A549                          | 76.4 $\mu\text{M}$ (IC <sub>50</sub> )    | Doxorubicin 0.43 $\mu\text{M}$ (IC <sub>50</sub> )  | [14] |
|                                          |                   | MTT/HuCCA-1                       | 87.6 $\mu\text{M}$ (IC <sub>50</sub> )    | Doxorubicin 0.69 $\mu\text{M}$ (IC <sub>50</sub> )  | [14] |
|                                          |                   | MTT/HeLa                          | 62.1 $\mu\text{M}$ (IC <sub>50</sub> )    | Doxorubicin 0.38 $\mu\text{M}$ (IC <sub>50</sub> )  | [14] |
|                                          |                   | MTT/HL-60                         | 14.6 $\mu\text{M}$ (IC <sub>50</sub> )    | Etoposide 1.18 $\mu\text{M}$ (IC <sub>50</sub> )    | [14] |
|                                          |                   | MTT/MDA-MB-231                    | 29.7 $\mu\text{M}$ (IC <sub>50</sub> )    | Doxorubicin 0.62 $\mu\text{M}$ (IC <sub>50</sub> )  | [14] |
| 6'-Iodoaureol (60)                       | Cytotoxicity      | MTT/MOLT-3                        | 39.8 $\mu\text{M}$ (IC <sub>50</sub> )    | Etoposide 0.03 $\mu\text{M}$ (IC <sub>50</sub> )    | [14] |
|                                          |                   | MTT/HepG2                         | 44.7 $\mu\text{M}$ (IC <sub>50</sub> )    | Doxorubicin 0.69 $\mu\text{M}$ (IC <sub>50</sub> )  | [14] |
|                                          |                   | MTT/A549                          | 68.2 $\mu\text{M}$ (IC <sub>50</sub> )    | Doxorubicin 0.43 $\mu\text{M}$ (IC <sub>50</sub> )  | [14] |
|                                          |                   | MTT/HuCCA-1                       | 63.6 $\mu\text{M}$ (IC <sub>50</sub> )    | Doxorubicin 0.69 $\mu\text{M}$ (IC <sub>50</sub> )  | [14] |
|                                          |                   | MTT/HeLa                          | 61.4 $\mu\text{M}$ (IC <sub>50</sub> )    | Doxorubicin 0.38 $\mu\text{M}$ (IC <sub>50</sub> )  | [14] |
|                                          |                   | MTT/HL-60                         | 43.2 $\mu\text{M}$ (IC <sub>50</sub> )    | Etoposide 1.18 $\mu\text{M}$ (IC <sub>50</sub> )    | [14] |
|                                          |                   | MTT/MDA-MB-231                    | 44.7 $\mu\text{M}$ (IC <sub>50</sub> )    | Doxorubicin 0.62 $\mu\text{M}$ (IC <sub>50</sub> )  | [14] |
| Smenohaimien E (67)                      | Anti-inflammatory | NO inhibition/LPS                 | 24.37 $\mu\text{M}$ (IC <sub>50</sub> )   | L-NMMA 22.1 $\mu\text{M}$ (IC <sub>50</sub> )       | [47] |
| Polyfibrospogol B (69)                   | Anti-inflammatory | NO inhibition/LPS                 | 30.43 $\mu\text{M}$ (IC <sub>50</sub> )   | L-NMMA 22.1 $\mu\text{M}$ (IC <sub>50</sub> )       | [47] |
| 19-Hydroxy-polyfibrospogol B (70)        | Anti-inflammatory | NO inhibition/LPS                 | 24.44 $\mu\text{M}$ (IC <sub>50</sub> )   | L-NMMA 22.1 $\mu\text{M}$ (IC <sub>50</sub> )       | [47] |

|                                  |                             |                                      |                                           |                                                          |      |
|----------------------------------|-----------------------------|--------------------------------------|-------------------------------------------|----------------------------------------------------------|------|
| Ilimaquinone (75)                | Anti-inflammatory           | NO inhibition/LPS                    | 10.40 $\mu\text{M}$ (IC <sub>50</sub> )   | L-NMMA 22.1 $\mu\text{M}$ (IC <sub>50</sub> )            | [47] |
| Dactyloquinone C (79)            | Cytotoxicity                | MTT/LU-1                             | 52.2 $\mu\text{g/mL}$ (IC <sub>50</sub> ) | Ellipticine 0.4 $\mu\text{g/mL}$ (IC <sub>50</sub> )     | [48] |
|                                  |                             | MTT/HL-60                            | 51.8 $\mu\text{g/mL}$ (IC <sub>50</sub> ) | Ellipticine 0.5 $\mu\text{g/mL}$ (IC <sub>50</sub> )     | [48] |
|                                  |                             | MTT/SK-Mel-2                         | 41.2 $\mu\text{g/mL}$ (IC <sub>50</sub> ) | Ellipticine 0.4 $\mu\text{g/mL}$ (IC <sub>50</sub> )     | [48] |
|                                  |                             | MTT/HepG-2                           | 61.1 $\mu\text{g/mL}$ (IC <sub>50</sub> ) | Ellipticine 0.6 $\mu\text{g/mL}$ (IC <sub>50</sub> )     | [48] |
|                                  |                             | MTT/MCF-7                            | 44.1 $\mu\text{g/mL}$ (IC <sub>50</sub> ) | Ellipticine 0.6 $\mu\text{g/mL}$ (IC <sub>50</sub> )     | [48] |
| Dactyloquinone D (80)            | Cytotoxicity                | MTT/LU-1                             | 1.1 $\mu\text{g/mL}$ (IC <sub>50</sub> )  | Ellipticine 0.4 $\mu\text{g/mL}$ (IC <sub>50</sub> )     | [48] |
|                                  |                             | MTT/HL-60                            | 0.7 $\mu\text{g/mL}$ (IC <sub>50</sub> )  | Ellipticine 0.5 $\mu\text{g/mL}$ (IC <sub>50</sub> )     | [48] |
|                                  |                             | MTT/SK-Mel-2                         | 1.3 $\mu\text{g/mL}$ (IC <sub>50</sub> )  | Ellipticine 0.4 $\mu\text{g/mL}$ (IC <sub>50</sub> )     | [48] |
|                                  |                             | MTT/HepG-2                           | 0.7 $\mu\text{g/mL}$ (IC <sub>50</sub> )  | Ellipticine 0.6 $\mu\text{g/mL}$ (IC <sub>50</sub> )     | [48] |
|                                  |                             | MTT/MCF-7                            | 1.6 $\mu\text{g/mL}$ (IC <sub>50</sub> )  | Ellipticine 0.6 $\mu\text{g/mL}$ (IC <sub>50</sub> )     | [48] |
| Smenohaimien F (83)              | Cytotoxicity                | MTT/LU-1                             | 10.0 $\mu\text{g/mL}$ (IC <sub>50</sub> ) | Ellipticine 0.4 $\mu\text{g/mL}$ (IC <sub>50</sub> )     | [48] |
|                                  |                             | MTT/HL-60                            | 13.7 $\mu\text{g/mL}$ (IC <sub>50</sub> ) | Ellipticine 0.5 $\mu\text{g/mL}$ (IC <sub>50</sub> )     | [48] |
|                                  |                             | MTT/SK-Mel-2                         | 23.5 $\mu\text{g/mL}$ (IC <sub>50</sub> ) | Ellipticine 0.4 $\mu\text{g/mL}$ (IC <sub>50</sub> )     | [48] |
|                                  |                             | MTT/HepG-2                           | 18.1 $\mu\text{g/mL}$ (IC <sub>50</sub> ) | Ellipticine 0.6 $\mu\text{g/mL}$ (IC <sub>50</sub> )     | [48] |
|                                  |                             | MTT/MCF-7                            | 27.9 $\mu\text{g/mL}$ (IC <sub>50</sub> ) | Ellipticine 0.6 $\mu\text{g/mL}$ (IC <sub>50</sub> )     | [48] |
| Smenohaimien A (100)             | Anti-inflammatory           | NO inhibition/LPS                    | 30.13 $\mu\text{M}$ (IC <sub>50</sub> )   | L-NMMA 22.1 $\mu\text{M}$ (IC <sub>50</sub> )            | [47] |
| Smenohaimien B (101)             | Anti-inflammatory           | NO inhibition/LPS                    | 28.33 $\mu\text{M}$ (IC <sub>50</sub> )   | L-NMMA 22.1 $\mu\text{M}$ (IC <sub>50</sub> )            | [47] |
| Furospinulosin 1 (107)           | Cytotoxicity                | MTT/HCT-116 (P <sup>53+/+</sup> )    | 104 $\mu\text{M}$ (IC <sub>50</sub> )     | Etoposide 3.4 $\mu\text{M}$ (IC <sub>50</sub> )          | [19] |
|                                  |                             | MTT/HCT-116 (P <sup>53-/-</sup> )    | 141 $\mu\text{M}$ (IC <sub>50</sub> )     | Etoposide 17 $\mu\text{M}$ (IC <sub>50</sub> )           | [19] |
|                                  |                             | MTT/HCT-116 (P <sup>21+/+</sup> )    | 155 $\mu\text{M}$ (IC <sub>50</sub> )     | Etoposide 3.4 $\mu\text{M}$ (IC <sub>50</sub> )          | [19] |
|                                  |                             | MTT/HCT-116 (P <sup>21-/-</sup> )    | 133 $\mu\text{M}$ (IC <sub>50</sub> )     | Etoposide 26 $\mu\text{M}$ (IC <sub>50</sub> )           | [19] |
| 4-Hydroxy-9-deoxoidiadione (108) | Antibacterial               | Microdilution/ <i>B. subtilis</i>    | 6.25 $\mu\text{M}$ (MIC)                  | Ampicillin 1.56 $\mu\text{M}$ (MIC)                      | [54] |
|                                  | Cytotoxicity                | SRB/K562                             | 5.7 $\mu\text{M}$ (IC <sub>50</sub> )     | Doxorubicin 4.9 $\mu\text{M}$ (IC <sub>50</sub> )        | [54] |
| 7E,12E,18R,20Z-Variabilin (110)  | Antibacterial               | Microdilution/ <i>Staph. aureus</i>  | 12.5 $\mu\text{M}$ (MIC)                  | Ampicillin 1.56 $\mu\text{M}$ (MIC)                      | [54] |
|                                  |                             | Microdilution/ <i>B. subtilis</i>    | 6.25 $\mu\text{M}$ (MIC)                  | Ampicillin 1.56 $\mu\text{M}$ (MIC)                      | [54] |
|                                  |                             | Microdilution/ <i>M. luteus</i>      | 6.25 $\mu\text{M}$ (MIC)                  | Ampicillin 3.12 $\mu\text{M}$ (MIC)                      | [54] |
|                                  |                             | Microdilution/ <i>P. vulgaris</i>    | 6.25 $\mu\text{M}$ (MIC)                  | Ampicillin 3.12 $\mu\text{M}$ (MIC)                      | [54] |
|                                  |                             | Microdilution/ <i>S. typhimurium</i> | 6.25 $\mu\text{M}$ (MIC)                  | Ampicillin 3.12 $\mu\text{M}$ (MIC)                      | [54] |
|                                  | Isocitrate lyase inhibition | Colorimetric/Isocitrate lyase kit    | 27.0 $\mu\text{M}$ (IC <sub>50</sub> )    | 3-Nitropropionate 6.05 $\mu\text{M}$ (IC <sub>50</sub> ) | [54] |
|                                  | Cytotoxicity                | SRB/K562                             | 43.7 $\mu\text{M}$ (IC <sub>50</sub> )    | Doxorubicin 4.9 $\mu\text{M}$ (IC <sub>50</sub> )        | [54] |

|                                                               |                                          |                                      |                                               |                                               |                          |
|---------------------------------------------------------------|------------------------------------------|--------------------------------------|-----------------------------------------------|-----------------------------------------------|--------------------------|
| 7E,13Z,18R,20Z-Felixinin (111)/8E,13Z,18R,20Z-Strobilin (112) | Antibacterial                            | Microdilution/ <i>Staph. aureus</i>  | 6.25 μM (MIC)                                 | Ampicillin 1.56 μM (MIC)                      | [54]                     |
|                                                               |                                          | Microdilution/ <i>B. subtilis</i>    | 3.12 μM (MIC)                                 | Ampicillin 1.56 μM (MIC)                      | [54]                     |
|                                                               |                                          | Microdilution/ <i>M. leuteus</i>     | 6.25 μM (MIC)                                 | Ampicillin 3.12 μM (MIC)                      | [54]                     |
|                                                               |                                          | Microdilution/ <i>P. vulgaris</i>    | 3.12 μM (MIC)                                 | Ampicillin 3.12 μM (MIC)                      | [54]                     |
|                                                               |                                          | Microdilution/ <i>S. typhimurium</i> | 12.5 μM (MIC)                                 | Ampicillin 3.12 μM (MIC)                      | [54]                     |
|                                                               | Isocitrate lyase inhibition              | Colorimetric/Isocitrate Lyase kit    | 24.1 μM (IC <sub>50</sub> )                   | 3-Nitropropionate 6.05 μM (IC <sub>50</sub> ) | [54]                     |
| 8Z,13Z,18R,20Z-Strobilin (113)                                | Cytotoxicity                             | SRB/K562                             | 16.9 μM (IC <sub>50</sub> )                   | Doxorubicin 4.9 μM (IC <sub>50</sub> )        | [54]                     |
|                                                               | Antibacterial                            | Microdilution/ <i>Staph. aureus</i>  | 6.25 μM (MIC)                                 | Ampicillin 1.56 μM (MIC)                      | [54]                     |
|                                                               |                                          | Microdilution/ <i>B. subtilis</i>    | 6.25 μM (MIC)                                 | Ampicillin 1.56 μM (MIC)                      | [54]                     |
|                                                               |                                          | Microdilution/ <i>M. leuteus</i>     | 3.12 μM (MIC)                                 | Ampicillin 3.12 μM (MIC)                      | [54]                     |
|                                                               |                                          | Microdilution/ <i>P. vulgaris</i>    | 6.25 μM (MIC)                                 | Ampicillin 3.12 μM (MIC)                      | [54]                     |
|                                                               |                                          | Microdilution/ <i>S. typhimurium</i> | 12.5 μM (MIC)                                 | Ampicillin 3.12 μM (MIC)                      | [54]                     |
| Isocitrate lyase inhibition                                   | Colorimetric/Isocitrate Lyase kit        | 31.2 μM (IC <sub>50</sub> )          | 3-Nitropropionate 6.05 μM (IC <sub>50</sub> ) | [54]                                          |                          |
| 12-Deacetoxy-23-acetoxyscalarin (114)                         | Cytotoxicity                             | SRB/K562                             | 3.7 μM (IC <sub>50</sub> )                    | Doxorubicin 4.9 μM (IC <sub>50</sub> )        | [54]                     |
|                                                               | Isocitrate lyase inhibition              | Colorimetric/Isocitrate Lyase kit    | 67.2 μM (IC <sub>50</sub> )                   | 3-Nitropropionate 6.05 μM (IC <sub>50</sub> ) | [54]                     |
| 2-Deacetoxy-23-acetoxy-19-O-acetylscalarin (115)              | Cytotoxicity                             | SRB/K562                             | 7.2 μM (IC <sub>50</sub> )                    | Doxorubicin 4.9 μM (IC <sub>50</sub> )        | [54]                     |
|                                                               | Antibacterial                            | Microdilution/ <i>B. subtilis</i>    | 0.78 μM (MIC)                                 | Ampicillin 1.56 μM (MIC)                      | [54]                     |
|                                                               |                                          | Microdilution/ <i>S. typhimurium</i> | 6.25 μM (MIC)                                 | Ampicillin 3.12 μM (MIC)                      | [54]                     |
| 12-Deacetoxy-19-O-acetyl-23-hydroxyscalarin (116)             | Cytotoxicity                             | SRB/K562                             | 0.13 μM (IC <sub>50</sub> )                   | Doxorubicin 4.9 μM (IC <sub>50</sub> )        | [54]                     |
|                                                               | Antibacterial                            | Microdilution/ <i>B. subtilis</i>    | 1.56 μM (MIC)                                 | Ampicillin 1.56 μM (MIC)                      | [54]                     |
|                                                               |                                          | Microdilution/ <i>M. leuteus</i>     | 3.12 μM (MIC)                                 | Ampicillin 3.12 μM (MIC)                      | [54]                     |
|                                                               |                                          | Microdilution/ <i>S. typhimurium</i> | 6.25 μM (MIC)                                 | Ampicillin 3.12 μM (MIC)                      | [54]                     |
|                                                               | Cytotoxicity                             | SRB/K562                             | 22.5 μM (IC <sub>50</sub> )                   | Doxorubicin 4.9 μM (IC <sub>50</sub> )        | [54]                     |
| 12-Deacetoxy-23-hydroxy-19-O-methylscalarin (117)             | Antibacterial                            | Microdilution/ <i>B. subtilis</i>    | 50.0 μM (MIC)                                 | Ampicillin 1.56 μM (MIC)                      | [54]                     |
|                                                               |                                          | Microdilution/ <i>S. typhimurium</i> | 6.25 μM (MIC)                                 | Ampicillin 3.12 μM (MIC)                      | [54]                     |
|                                                               | Isocitrate lyase inhibition              | Colorimetric/Isocitrate Lyase kit    | 42.0 μM (IC <sub>50</sub> )                   | 3-Nitropropionate 6.05 μM (IC <sub>50</sub> ) | [54]                     |
|                                                               | Cytotoxicity                             | SRB/K562                             | 0.11 μM (IC <sub>50</sub> )                   | Doxorubicin 4.9 μM (IC <sub>50</sub> )        | [54]                     |
|                                                               | 12-Deacetoxy-23-hydroxyheteronemin (118) | Antibacterial                        | Microdilution/ <i>B. subtilis</i>             | 3.12 μM (MIC)                                 | Ampicillin 1.56 μM (MIC) |

|                                                        |                             |                                      |                                    |                                                    |      |
|--------------------------------------------------------|-----------------------------|--------------------------------------|------------------------------------|----------------------------------------------------|------|
|                                                        | Cytotoxicity                | SRB/K562                             | 4.9 $\mu$ M (IC <sub>50</sub> )    | Doxorubicin 4.9 $\mu$ M (IC <sub>50</sub> )        | [54] |
| 12-deacetoxy-23-acetoxysteronemin (119)                | Cytotoxicity                | SRB/K562                             | 6.8 $\mu$ M (IC <sub>50</sub> )    | Doxorubicin 4.9 $\mu$ M (IC <sub>50</sub> )        | [54] |
| 12-Deacetoxy-19-O-acetyl-16-deacetoxyheteronemin (120) | Antibacterial               | Microdilution/ <i>B. subtilis</i>    | 3.12 $\mu$ M (MIC)                 | Ampicillin 1.56 $\mu$ M (MIC)                      | [54] |
|                                                        |                             | Microdilution/ <i>S. typhimurium</i> | 12.5 $\mu$ M (MIC)                 | Ampicillin 3.12 $\mu$ M (MIC)                      | [54] |
|                                                        | Cytotoxicity                | SRB/K562                             | 5.8 $\mu$ M (IC <sub>50</sub> )    | Doxorubicin 4.9 $\mu$ M (IC <sub>50</sub> )        | [54] |
| 12-Deacetoxy-23-aldehydeheteronemin (121)              | Cytotoxicity                | SRB/K562                             | 17.5 $\mu$ M (IC <sub>50</sub> )   | Doxorubicin 4.9 $\mu$ M (IC <sub>50</sub> )        | [54] |
| 12-deacetoxy-23-acetoxyscalafuran (124)                | Antibacterial               | Microdilution/ <i>B. subtilis</i>    | 3.12 $\mu$ M (MIC)                 | Ampicillin 1.56 $\mu$ M (MIC)                      | [54] |
|                                                        |                             | Microdilution/ <i>M. luteus</i>      | 25.0 $\mu$ M (MIC)                 | Ampicillin 3.12 $\mu$ M (MIC)                      | [54] |
|                                                        | Cytotoxicity                | SRB/K562                             | 2.3 $\mu$ M (IC <sub>50</sub> )    | Doxorubicin 4.9 $\mu$ M (IC <sub>50</sub> )        | [54] |
| 18S-12-Deacetoxy-23-acetoxy-20-carboxyscaladial (125)  | Cytotoxicity                | SRB/K562                             | 4.2 $\mu$ M (IC <sub>50</sub> )    | Doxorubicin 4.9 $\mu$ M (IC <sub>50</sub> )        | [54] |
| 18S-12-Deacetoxy-23-acetoxy-20-methoxyscaladial (126)  | Cytotoxicity                | SRB/K562                             | 3.7 $\mu$ M (IC <sub>50</sub> )    | Doxorubicin 4.9 $\mu$ M (IC <sub>50</sub> )        | [54] |
| 18R-12-Deacetoxy-23-acetoxy-20-methoxyscaladial (127)  | Antibacterial               | Microdilution/ <i>Staph. aureus</i>  | 25.0 $\mu$ M (MIC)                 | Ampicillin 1.56 $\mu$ M (MIC)                      | [54] |
|                                                        |                             | Microdilution/ <i>B. subtilis</i>    | 0.78 $\mu$ M (MIC)                 | Ampicillin 1.56 $\mu$ M (MIC)                      | [54] |
|                                                        |                             | Microdilution/ <i>M. luteus</i>      | 12.5 $\mu$ M (MIC)                 | Ampicillin 3.12 $\mu$ M (MIC)                      | [54] |
|                                                        |                             | Microdilution/ <i>P. vulgaris</i>    | 6.25 $\mu$ M (MIC)                 | Ampicillin 3.12 $\mu$ M (MIC)                      | [54] |
|                                                        |                             | Microdilution/ <i>S. typhimurium</i> | 12.5 $\mu$ M (MIC)                 | Ampicillin 3.12 $\mu$ M (MIC)                      | [54] |
|                                                        | Isocitrate lyase inhibition | Colorimetric/Isocitrate Lyase kit    | 55.0 $\mu$ M (IC <sub>50</sub> )   | 3-Nitropropionate 6.05 $\mu$ M (IC <sub>50</sub> ) | [54] |
|                                                        | Cytotoxicity                | SRB/K562                             | 8.6 $\mu$ M (IC <sub>50</sub> )    | Doxorubicin 4.9 $\mu$ M (IC <sub>50</sub> )        | [54] |
| Smenocerone B (138)                                    | Cytotoxicity                | MTT/LU-1                             | 5.5 $\mu$ g/mL (IC <sub>50</sub> ) | Ellipticine 0.4 $\mu$ g/mL (IC <sub>50</sub> )     | [48] |
|                                                        |                             | MTT/HepG-2                           | 3.2 $\mu$ g/mL (IC <sub>50</sub> ) | Ellipticine 0.5 $\mu$ g/mL (IC <sub>50</sub> )     | [48] |
|                                                        |                             | MTT/HL-60                            | 4.0 $\mu$ g/mL (IC <sub>50</sub> ) | Ellipticine 0.4 $\mu$ g/mL (IC <sub>50</sub> )     | [48] |
|                                                        |                             | MTT/MCF-7                            | 4.1 $\mu$ g/mL (IC <sub>50</sub> ) | Ellipticine 0.6 $\mu$ g/mL (IC <sub>50</sub> )     | [48] |
|                                                        |                             | MTT/SK-Mel-2                         | 5.7 $\mu$ g/mL (IC <sub>50</sub> ) | Ellipticine 0.6 $\mu$ g/mL (IC <sub>50</sub> )     | [48] |



**Table S3.** Aplysinopsin derivatives reported from genus *Smenospongia*.

| Compound Name                                                                               | Source                  | Place                                              | Mol. Wt. | Mol. Formula                                                                  | Ref.    |
|---------------------------------------------------------------------------------------------|-------------------------|----------------------------------------------------|----------|-------------------------------------------------------------------------------|---------|
| Aplysinopsin (26)                                                                           | <i>S. aurea</i>         | Glover and Lighthouse Reefs, Belize, Caribbean Sea | 254      | C <sub>14</sub> H <sub>14</sub> N <sub>4</sub> O                              | [15,16] |
|                                                                                             | <i>S. aurea</i>         | Milne Bay region, Papua New Guinea                 | -        | -                                                                             | [22]    |
| 6-Bromoaplysinopsin (27)                                                                    | <i>S. aurea</i>         | Glover and Lighthouse Reefs, Belize, Caribbean Sea | 332      | C <sub>14</sub> H <sub>13</sub> BrN <sub>4</sub> O                            | [15,16] |
|                                                                                             | <i>S. aurea</i>         | Discovery Bay, Jamaica                             | -        | -                                                                             | [18]    |
|                                                                                             | <i>S. aurea</i>         | Florida Keys, USA                                  | -        | -                                                                             | [17]    |
| 6-Bromo-4'-N-demethylaplysinopsin (28)                                                      | <i>S. aurea</i>         | Glover and Lighthouse Reefs, Belize, Caribbean Sea | 318      | C <sub>13</sub> H <sub>11</sub> BrN <sub>4</sub> O                            | [16]    |
| 6-Bromo-3'-deimino-2',4'-bis(demethyl)-3'-oxoaplysinopsin (29)                              | <i>S. aurea</i>         | San Salvador Island coasts                         | 304      | C <sub>12</sub> H <sub>8</sub> BrN <sub>3</sub> O <sub>2</sub>                | [15,34] |
| 6-Bromo-1'-ethoxy-1',8-dihydroaplysinopsin (30)                                             | <i>S. aurea</i>         | Milne Bay region, Papua New Guinea                 | 378      | C <sub>16</sub> H <sub>19</sub> BrN <sub>4</sub> O <sub>2</sub>               | [22]    |
| Isoplysin A (31)                                                                            | <i>S. aurea</i>         | Discovery Bay, Jamaica                             | 254      | C <sub>14</sub> H <sub>14</sub> N <sub>4</sub> O                              | [18]    |
| 2'-de-N-Methylaplysinopsin (32)                                                             | <i>S. aurea</i>         | Discovery Bay, Jamaica                             | 240      | C <sub>13</sub> H <sub>12</sub> N <sub>4</sub> O                              | [18]    |
|                                                                                             | <i>S. aurea</i>         | Florida Keys, USA                                  | -        | -                                                                             | [17]    |
| 6-Bromo-2'-de-N-methylaplysinopsin (33)                                                     | <i>S. aurea</i>         | Discovery Bay, Jamaica                             | 318      | C <sub>13</sub> H <sub>11</sub> BrN <sub>4</sub> O                            | [18]    |
|                                                                                             | <i>Smenospongia</i> sp. | South side of Porpoise Cay, Queensland, Australia  | -        | -                                                                             | [20]    |
| N-3'-Methylaplysinopsin (34)                                                                | <i>S. aurea</i>         | Discovery Bay, Jamaica                             | 268      | C <sub>15</sub> H <sub>16</sub> N <sub>4</sub> O                              | [18]    |
| N-3'-Ethylaplysinopsin (35)                                                                 | <i>S. aurea</i>         | Discovery Bay, Jamaica                             | 282      | C <sub>16</sub> H <sub>18</sub> N <sub>4</sub> O                              | [18]    |
| (R and S) of 5'-[(5,6-dibromo-1H-indol-3-yl)methyl]-3'-methylimidazolidine-2',4'-dione (36) | <i>Smenospongia</i> sp. | PP Island, Andaman Sea, Krabi province, Thailand   | 398      | C <sub>13</sub> H <sub>11</sub> Br <sub>2</sub> N <sub>3</sub> O <sub>2</sub> | [14]    |
| 5,6-Dibromo-2'-demethylaplysinopsin (37)                                                    | <i>Smenospongia</i> sp. | PP Island, Andaman Sea, Krabi province, Thailand   | 395      | C <sub>13</sub> H <sub>10</sub> Br <sub>2</sub> N <sub>4</sub> O              | [14]    |

**Table S4.** Bisspiroimidazolidinone alkaloids reported from genus *Smenospongia*.

| Compound Name        | Source                  | Place                                                                    | Mol. Wt. | Mol. Formula                                                                  | Ref. |
|----------------------|-------------------------|--------------------------------------------------------------------------|----------|-------------------------------------------------------------------------------|------|
| Dictazoline A (38)   | <i>S. cerebriformis</i> | Hospital Point on Solarte Isle, Boca del Toro, northwest coast of Panama | 664      | C <sub>28</sub> H <sub>26</sub> Br <sub>2</sub> N <sub>8</sub> O <sub>2</sub> | [25] |
| Dictazoline B (39)   | <i>S. cerebriformis</i> | Hospital Point on Solarte Isle, Boca del Toro, northwest coast of Panama | 636      | C <sub>26</sub> H <sub>22</sub> Br <sub>2</sub> N <sub>8</sub> O <sub>2</sub> | [25] |
| Tubastrindole A (40) | <i>S. cerebriformis</i> | Hospital Point on Solarte Isle, Boca del Toro, northwest coast of Panama | 586      | C <sub>28</sub> H <sub>27</sub> BrN <sub>8</sub> O <sub>2</sub>               | [25] |
| Tubastrindole B (41) | <i>S. cerebriformis</i> | Hospital Point on Solarte Isle, Boca del Toro, northwest coast of Panama | 508      | C <sub>28</sub> H <sub>28</sub> N <sub>8</sub> O <sub>2</sub>                 | [25] |

**Table S5.** Polyketides reported from genus *Smenospongia*.

| Compound Name         | Source             | Place                                   | Mol. Wt. | Mol. Formula                                                      | Ref.       |
|-----------------------|--------------------|-----------------------------------------|----------|-------------------------------------------------------------------|------------|
| Smenamide A (42)      | <i>S. aurea</i>    | Coast of Little Inagua, Bahamas Islands | 500      | C <sub>27</sub> H <sub>38</sub> ClN <sub>2</sub> O <sub>4</sub>   | [26,30,31] |
| Smenamide B (43)      | <i>S. aurea</i>    | Coast of Little Inagua, Bahamas Islands | 500      | C <sub>27</sub> H <sub>38</sub> ClN <sub>2</sub> O <sub>4</sub>   | [26,30,31] |
| Smenamide C (44)      | <i>S. aurea</i>    | Coast of Little Inagua, Bahamas Islands | 452      | C <sub>24</sub> H <sub>37</sub> ClN <sub>2</sub> O <sub>4</sub>   | [30]       |
| Smenamide D (45)      | <i>S. aurea</i>    | Coast of Little Inagua, Bahamas Islands | 452      | C <sub>24</sub> H <sub>37</sub> ClN <sub>2</sub> O <sub>4</sub>   | [30]       |
| Smenamide E (46)      | <i>S. aurea</i>    | Coast of Little Inagua, Bahamas Islands | 484      | C <sub>25</sub> H <sub>41</sub> ClN <sub>2</sub> O <sub>5</sub>   | [30]       |
| Smenamide F (47)      | <i>S. aurea</i>    | Coast of Little Inagua, Bahamas Islands | 518      | C <sub>28</sub> H <sub>39</sub> ClN <sub>2</sub> O <sub>5</sub>   | [30]       |
| Smenamide G (48)      | <i>S. aurea</i>    | Coast of Little Inagua, Bahamas Islands | 518      | C <sub>28</sub> H <sub>39</sub> ClN <sub>2</sub> O <sub>5</sub>   |            |
| Smenothiazole A (49)  | <i>S. aurea</i>    | Coast of Little Inagua, Bahamas Islands | 485      | C <sub>26</sub> H <sub>32</sub> ClN <sub>3</sub> O <sub>2</sub> S | [31]       |
| Smenothiazole B (50)  | <i>S. aurea</i>    | Coast of Little Inagua, Bahamas Islands | 461      | C <sub>24</sub> H <sub>32</sub> ClN <sub>3</sub> O <sub>2</sub> S | [31]       |
| Smenolactone A (51)   | <i>S. aurea</i>    | Coast of Mayaguana Island, Bahamas      | 346      | C <sub>20</sub> H <sub>23</sub> ClO <sub>3</sub>                  | [32]       |
| Smenolactone B (52)   | <i>S. aurea</i>    | Coast of Mayaguana Island, Bahamas      | 420      | C <sub>24</sub> H <sub>33</sub> ClO <sub>4</sub>                  | [32]       |
| Smenolactone C (53)   | <i>S. aurea</i>    | Coast of Mayaguana Island, Bahamas      | 420      | C <sub>24</sub> H <sub>33</sub> ClO <sub>4</sub>                  | [32]       |
| Smenolactone D (54)   | <i>S. aurea</i>    | Coast of Mayaguana Island, Bahamas      | 418      | C <sub>24</sub> H <sub>31</sub> ClO <sub>4</sub>                  | [32]       |
| Trichophycin B (55)   | <i>S. aurea</i>    | Coast of Mayaguana Island, Bahamas      | 420      | C <sub>24</sub> H <sub>33</sub> ClO <sub>4</sub>                  | [32]       |
| Conulothiazole A (56) | <i>S. conulosa</i> | Coast of Little Inagua, Bahamas Islands | 388      | C <sub>21</sub> H <sub>25</sub> ClN <sub>2</sub> OS               | [33]       |
| Conulothiazole B (57) | <i>S. conulosa</i> | Coast of Little Inagua, Bahamas Islands | 402      | C <sub>22</sub> H <sub>27</sub> ClN <sub>2</sub> OS               | [33]       |

**Table S6.** Terpenoids reported from genus *Smenospongia*.

| Compound Name                         | Source                                      | Place                                               | Mol. Wt. | Mol. Formula                                     | Ref.    |
|---------------------------------------|---------------------------------------------|-----------------------------------------------------|----------|--------------------------------------------------|---------|
| Aureol (58)                           | <i>S. aurea</i>                             | Glover and Lighthouse Reefs, Belize, Caribbean Sea  | 314      | C <sub>21</sub> H <sub>30</sub> O <sub>2</sub>   | [15,16] |
|                                       | <i>S. aurea</i>                             | San Salvador Island coasts                          | -        | -                                                | [34]    |
|                                       | <i>S. aurea</i>                             | Discovery Bay, Jamaica                              | -        | -                                                | [18]    |
|                                       | <i>Smenospongia</i> sp.                     | Batanes, Philippines                                | -        | -                                                | [19]    |
|                                       | <i>Smenospongia</i> sp.                     | Green Island, Taiwan                                | -        | -                                                | [52]    |
|                                       | <i>Smenospongia</i> sp.                     | PP Island, Andaman Sea (Krabi province, Thailand)   | -        | -                                                | [14]    |
| 6'-Chloroaureol (59)                  | <i>S. aurea</i>                             | San Salvador Island coasts                          | 348      | C <sub>21</sub> H <sub>29</sub> ClO <sub>2</sub> | [34]    |
|                                       | <i>S. aurea</i>                             | Discovery Bay, Jamaica                              | -        | -                                                | [18]    |
|                                       | <i>S. aurea</i>                             | Florida Keys, USA                                   | -        | -                                                | [17]    |
|                                       | <i>Smenospongia</i> sp.                     | PP Island, Andaman Sea, Krabi province, Thailand    | -        | -                                                | [14]    |
| 6'-Iodoaureol (60)                    | <i>Smenospongia</i> sp.                     | PP Island, Andaman Sea, Krabi province, Thailand    | 440      | C <sub>21</sub> H <sub>29</sub> IO <sub>2</sub>  | [14]    |
| Aureol acetate (61)                   | <i>S. aurea</i>                             | San Salvador Island coasts                          | 356      | C <sub>23</sub> H <sub>32</sub> O <sub>3</sub>   | [34]    |
|                                       | <i>S. aurea</i>                             | Discovery Bay, Jamaica                              | -        | -                                                | [18]    |
|                                       | <i>Smenospongia</i> sp.                     | PP Island, Andaman Sea, Krabi province, Thailand    | -        | -                                                | [14]    |
| Chromazonarol (62)                    | <i>S. aurea</i>                             | Glover and Lighthouse Reefs, Belize, Caribbean Sea  | 314      | C <sub>21</sub> H <sub>30</sub> O <sub>2</sub>   | [15]    |
|                                       | <i>Smenospongia</i> sp.                     | PP Island, Andaman Sea, Krabi province, Thailand    | -        | -                                                | [14]    |
| 8-Epi-chromazonarol (63)              | <i>S. aurea</i>                             | -Puerto Morelos, Mexico                             | 314      | C <sub>21</sub> H <sub>30</sub> O <sub>2</sub>   | [15]    |
|                                       |                                             | -Glover and Lighthouse Reefs, Belize, Caribbean Sea |          |                                                  |         |
|                                       | <i>S. aurea</i>                             | San Salvador Island coasts                          | -        | -                                                | [34]    |
| Smenodiol (64)                        | <i>Smenospongia</i> sp.                     | Therese Island, Seychelles                          | 372      | C <sub>23</sub> H <sub>32</sub> O <sub>4</sub>   | [55]    |
| Smenospondiol (65)                    | <i>Smenospongia</i> sp.                     | Gulf of Aden, near Djibouti, Red Sea                | 372      | C <sub>23</sub> H <sub>32</sub> O <sub>4</sub>   | [38]    |
| Smenohaimien D (66)                   | <i>S. cerebriiformis</i>                    | Vinhmoc, Quangtri, Vietnam                          | 416      | C <sub>24</sub> H <sub>32</sub> O <sub>6</sub>   | [47]    |
| Smenohaimien E (67)                   | <i>S. cerebriiformis</i>                    | Vinhmoc, Quangtri, Vietnam                          | 402      | C <sub>24</sub> H <sub>34</sub> O <sub>5</sub>   | [47]    |
| Polyfibrospongol A (68)               | <i>S. cerebriiformis</i>                    | Vinhmoc, Quangtri, Vietnam                          | 386      | C <sub>24</sub> H <sub>34</sub> O <sub>4</sub>   | [47,64] |
| Polyfibrospongol B (69)               | <i>S. cerebriiformis</i>                    | Vinhmoc, Quangtri, Vietnam                          | 402      | C <sub>24</sub> H <sub>34</sub> O <sub>5</sub>   | [47,64] |
| 19-Hydroxy-polyfibrospongol B (70)    | <i>S. cerebriiformis</i>                    | Vinhmoc, Quangtri, Vietnam                          | 418      | C <sub>24</sub> H <sub>34</sub> O <sub>6</sub>   | [47,64] |
| Dictyoceratin C (71)                  | <i>S. cerebriiformis</i>                    | Vinhmoc, Quangtri, Vietnam                          | 356      | C <sub>23</sub> H <sub>32</sub> O <sub>3</sub>   | [47,64] |
| Smenorthoquinone (72)                 | <i>Smenospongia</i> sp.                     | Gulf of Aden, Red Sea, near Djibouti                | 372      | C <sub>23</sub> H <sub>32</sub> O <sub>4</sub>   | [39]    |
| Arenarone (73)                        | <i>Smenospongia</i> sp.                     | Gulf of Aden, Red Sea, near Djibouti                | 312      | C <sub>21</sub> H <sub>28</sub> O <sub>2</sub>   | [39]    |
| Avarone (74)                          | <i>Smenospongia</i> sp.                     | Gulf of Aden, Red Sea, near Djibouti                | 312      | C <sub>21</sub> H <sub>28</sub> O <sub>2</sub>   | [39]    |
| Ilimaquinone (75)                     | <i>Smenospongia</i> sp.                     | Gulf of Aden, Red Sea, near Djibouti                | 358      | C <sub>22</sub> H <sub>30</sub> O <sub>4</sub>   | [39,28] |
|                                       | <i>S. cerebriiformis</i>                    | -                                                   | -        | -                                                | [43]    |
| Smenoquinone (76)                     | <i>Smenospongia</i> sp.                     | Gulf of Aden, Red Sea, near Djibouti                | 344      | C <sub>21</sub> H <sub>28</sub> O <sub>4</sub>   | [39]    |
| (+)-5-Epi-20-O-ethylsmenoquinone (77) | <i>S. aurea</i><br><i>S. cerebriiformis</i> | Key Largo, FL, Florida key, USA                     | 372      | C <sub>23</sub> H <sub>32</sub> O <sub>4</sub>   | [46]    |
| Smenoqualone (78)                     | <i>Smenospongia</i> sp.                     | Gulf of Aden, Red Sea, near Djibouti                | 358      | C <sub>22</sub> H <sub>30</sub> O <sub>4</sub>   | [41]    |
| Dactyloquinone C (79)                 | <i>S. cerebriiformis</i>                    | Quang Tri, Vietnam                                  | 356      | C <sub>22</sub> H <sub>28</sub> O <sub>4</sub>   | [48]    |

|                                |                                            |                                                  |     |                                                 |         |
|--------------------------------|--------------------------------------------|--------------------------------------------------|-----|-------------------------------------------------|---------|
|                                | <i>S. cerebriformis</i>                    | Vinhmoc, Quangtri, Vietnam                       | -   | -                                               | [60]    |
| Dactyloquinone D (80)          | <i>S. cerebriformis</i>                    | Quang Tri, Vietnam                               | 356 | C <sub>22</sub> H <sub>28</sub> O <sub>4</sub>  | [48]    |
|                                | <i>S. cerebriformis</i>                    | Vinhmoc, Quangtri, Vietnam                       | -   | -                                               | [60]    |
| Neodactyloquinone (81)         | <i>S. cerebriformis</i>                    | Quang Tri, Vietnam                               | 356 | C <sub>22</sub> H <sub>28</sub> O <sub>4</sub>  | [48]    |
|                                | <i>S. cerebriformis</i>                    | Vinhmoc, Quangtri, Vietnam                       | -   | -                                               | [63]    |
| Smenospongine (82)             | <i>Smenospongia</i> sp.                    | Gulf of Aden, Red Sea, near Djibouti,            | 343 | C <sub>21</sub> H <sub>29</sub> NO <sub>3</sub> | [38,39] |
|                                | <i>S. cerebriformis</i>                    | Vinhmoc, Quangtri, Vietnam                       | -   | -                                               | [47]    |
| Smenohaimien F (83)            | <i>S. cerebriformis</i>                    | Quang Tri, Vietnam                               | 341 | C <sub>21</sub> H <sub>27</sub> NO <sub>3</sub> | [48]    |
| Smenospongiorine (84)          | <i>Smenospongia</i> sp.                    | Gulf of Aden, near Djibouti, Red Sea             | 399 | C <sub>25</sub> H <sub>37</sub> NO <sub>3</sub> | [39]    |
| Smenospongiarine (85)          | <i>Smenospongia</i> sp.                    | Gulf of Aden, near Djibouti, Red Sea             | 413 | C <sub>26</sub> H <sub>39</sub> NO <sub>3</sub> | [39]    |
| Smenospongidine (86)           | <i>Smenospongia</i> sp.                    | Gulf of Aden, near Djibouti, Red Sea             | 447 | C <sub>29</sub> H <sub>37</sub> NO <sub>3</sub> | [39]    |
| (-)-Nakijinol E (87)           | <i>S. aurea</i><br><i>S. cerebriformis</i> | Key Largo, FL, Florida key, USA                  | 383 | C <sub>24</sub> H <sub>33</sub> NO <sub>3</sub> | [46]    |
| (+)-5-Epi-nakijinol E (88)     | <i>S. aurea</i><br><i>S. cerebriformis</i> | Key Largo, FL, Florida key, USA                  | 383 | C <sub>24</sub> H <sub>33</sub> NO <sub>3</sub> | [46]    |
| Nakijinone A (89)              | <i>S. aurea</i><br><i>S. cerebriformis</i> | Key Largo, FL, Florida key, USA                  | 397 | C <sub>25</sub> H <sub>35</sub> NO <sub>3</sub> | [46]    |
| 5-Epi-nakijinone A (90)        | <i>S. aurea</i><br><i>S. cerebriformis</i> | Key Largo, FL, Florida key, USA                  | 397 | C <sub>25</sub> H <sub>35</sub> NO <sub>3</sub> | [46]    |
| Smenohaimien C (91)            | <i>S. cerebriformis</i>                    | Vinhmoc, Quangtri, Vietnam                       | 369 | C <sub>23</sub> H <sub>31</sub> NO <sub>3</sub> | [47]    |
| Smenotronic acid (92)          | <i>Smenospongia</i> sp.                    | Gulf of Aden, near Djibouti, Red Sea             | 362 | C <sub>21</sub> H <sub>30</sub> O <sub>5</sub>  | [49]    |
| Dactylospongenone A (93)       | <i>S. cerebriformis</i>                    | Sea of Quangtri, Vietnam                         | 390 | C <sub>23</sub> H <sub>34</sub> O <sub>5</sub>  | [35]    |
| Dactylospongenone B (94)       | <i>S. cerebriformis</i>                    | Sea of Quangtri, Vietnam                         | 390 | C <sub>23</sub> H <sub>34</sub> O <sub>5</sub>  | [35]    |
| Dactylospongenone C (95)       | <i>S. cerebriformis</i>                    | Sea of Quangtri, Vietnam                         | 390 | C <sub>23</sub> H <sub>34</sub> O <sub>5</sub>  | [35]    |
| Dactylospongenone D (96)       | <i>S. cerebriformis</i>                    | Sea of Quangtri, Vietnam                         | 390 | C <sub>23</sub> H <sub>34</sub> O <sub>5</sub>  | [35]    |
| (-)-Dactylospongenone E (97)   | <i>S. aurea</i><br><i>S. cerebriformis</i> | Key Largo, FL, Florida key, USA                  | 404 | C <sub>24</sub> H <sub>36</sub> O <sub>5</sub>  | [46]    |
| 5-Epi-dactylospongenone E (98) | <i>S. aurea</i><br><i>S. cerebriformis</i> | Key Largo, FL, Florida key, USA                  | 404 | C <sub>24</sub> H <sub>36</sub> O <sub>5</sub>  | [46]    |
| 5-Epi-dactylospongenone F (99) | <i>S. aurea</i><br><i>S. cerebriformis</i> | Key Largo, FL, Florida key, USA                  | 404 | C <sub>24</sub> H <sub>36</sub> O <sub>5</sub>  | [46]    |
| Smenohaimien A (100)           | <i>S. cerebriformis</i>                    | Vinhmoc, Quangtri, Vietnam                       | 332 | C <sub>21</sub> H <sub>32</sub> O <sub>3</sub>  | [47]    |
| Smenohaimien B (101)           | <i>S. cerebriformis</i>                    | Vinhmoc, Quangtri, Vietnam                       | 332 | C <sub>21</sub> H <sub>32</sub> O <sub>3</sub>  | [47]    |
| 6'-Aureoxaureol (102)          | <i>Smenospongia</i> sp.                    | PP Island, Andaman Sea, Krabi province, Thailand | 626 | C <sub>42</sub> H <sub>58</sub> O <sub>4</sub>  | [14]    |
| Diterpenoids                   |                                            |                                                  |     |                                                 |         |
| Amijiol (103)                  | <i>S. cerebriformis</i>                    | Quang Tri, Vietnam                               | 304 | C <sub>20</sub> H <sub>32</sub> O <sub>2</sub>  | [48]    |
| Isoamijiol (104)               | <i>S. cerebriformis</i>                    | Quang Tri, Vietnam                               | 304 | C <sub>20</sub> H <sub>32</sub> O <sub>2</sub>  | [48]    |
| Sesterterpenoids               |                                            |                                                  |     |                                                 |         |
| Manoalide (105)                | <i>Smenospongia</i> sp.                    | Ninami-jima Island, Nichinan-oshima Island       | 416 | C <sub>25</sub> H <sub>36</sub> O <sub>5</sub>  | [53]    |
| seco-Manoalide (106)           | <i>Smenospongia</i> sp.                    | Ninami-jima Island, Nichinan-oshima Island       | 416 | C <sub>25</sub> H <sub>36</sub> O <sub>5</sub>  | [53]    |
| Manoalide 25-acetate (107)     | <i>Smenospongia</i> sp.                    | Ninami-jima Island, Nichinan-oshima Island       | 458 | C <sub>27</sub> H <sub>38</sub> O <sub>6</sub>  | [53]    |
| (4E,6E)-Dehydromanoalide (108) | <i>Smenospongia</i> sp.                    | Ninami-jima Island, Nichinan-oshima Island       | 398 | C <sub>25</sub> H <sub>34</sub> O <sub>4</sub>  | [53]    |
| Furospinulosin 1 (109)         | <i>Smenospongia</i> sp.                    | Batanes, Philippines                             | 354 | C <sub>25</sub> H <sub>38</sub> O               | [19]    |
|                                | <i>Smenospongia</i> sp.                    | PP Island, Andaman Sea, Krabi province, Thailand | -   | -                                               | [14]    |

|                                                        |                         |                                             |     |                                                |      |
|--------------------------------------------------------|-------------------------|---------------------------------------------|-----|------------------------------------------------|------|
| 4-Hydroxy-9-deoxoidiadione (110)                       | <i>Smenospongia</i> sp. | Shore of Gagu-Do Island, southwestern Korea | 386 | C <sub>25</sub> H <sub>38</sub> O <sub>3</sub> | [35] |
|                                                        | <i>Smenospongia</i> sp. | Shore of Soheuksan Island, Korea            | -   | -                                              | [54] |
| 4-Acetoxy-9-deoxoidiadione (111)                       | <i>Smenospongia</i> sp. | Shore of Gagu-Do Island, southwestern Korea | 428 | C <sub>27</sub> H <sub>40</sub> O <sub>4</sub> | [35] |
| 7E,12E,18R,20Z-Variabilin (112)                        | <i>Smenospongia</i> sp. | Shore of Soheuksan Island, Korea            | 398 | C <sub>25</sub> H <sub>34</sub> O <sub>4</sub> | [54] |
| 7E,13Z,18R,20Z-Felixinin (113)                         | <i>Smenospongia</i> sp. | Shore of Soheuksan Island, Korea            | 398 | C <sub>25</sub> H <sub>34</sub> O <sub>4</sub> | [54] |
| 8E,13Z,18R,20Z-Strobilin (114)                         | <i>Smenospongia</i> sp. | Shore of Soheuksan Island, Korea            | 398 | C <sub>25</sub> H <sub>34</sub> O <sub>4</sub> | [54] |
| 8Z,13Z,18R,20Z-Strobilin (115)                         | <i>Smenospongia</i> sp. | Shore of Soheuksan Island, Korea            | 398 | C <sub>25</sub> H <sub>34</sub> O <sub>4</sub> | [54] |
| 12-Deacetoxy-23-acetoxyscalarin (116)                  | <i>Smenospongia</i> sp. | Shore of Gagu-Do Island, southwestern Korea | 444 | C <sub>27</sub> H <sub>40</sub> O <sub>5</sub> | [35] |
|                                                        | <i>Smenospongia</i> sp. | Shore of Soheuksan Island, Korea            | -   | -                                              | [54] |
|                                                        | <i>Smenospongia</i> sp. | Gageo Island, South Korea                   | -   | -                                              | [53] |
| 12-Deacetoxy-23-acetoxy-19-O-acetylscalarin (117)      | <i>Smenospongia</i> sp. | Shore of Gagu-Do Island, southwestern Korea | 486 | C <sub>29</sub> H <sub>42</sub> O <sub>6</sub> | [35] |
|                                                        | <i>Smenospongia</i> sp. | Shore of Soheuksan Island, Korea            | -   | -                                              | [54] |
| 12-Deacetoxy-19-O-acetyl-23-hydroxyscalarin (118)      | <i>Smenospongia</i> sp. | Shore of Soheuksan Island, Korea            | 444 | C <sub>27</sub> H <sub>40</sub> O <sub>5</sub> | [54] |
| 12-Deacetoxy-23-hydroxy-19-O-methylscalarin (119)      | <i>Smenospongia</i> sp. | Shore of Soheuksan Island, Korea            | 402 | C <sub>26</sub> H <sub>42</sub> O <sub>3</sub> | [54] |
| 12-Deacetoxy-23-hydroxyheteronemin (120)               | <i>Smenospongia</i> sp. | Shore of Gagu-Do Island, southwestern Korea | 488 | C <sub>29</sub> H <sub>44</sub> O <sub>6</sub> | [35] |
|                                                        | <i>Smenospongia</i> sp. | Gageo Island, South Korea                   | -   | -                                              | [53] |
| 12-Deacetoxy-23-acetoxylheteronemin (121)              | <i>Smenospongia</i> sp. | Shore of Soheuksan Island, Korea            | 530 | C <sub>31</sub> H <sub>46</sub> O <sub>7</sub> | [54] |
|                                                        | <i>Smenospongia</i> sp. | Gageo Island, South Korea                   | -   | -                                              | [53] |
| 12-Deacetoxy-19-O-acetyl-16-deacetoxyheteronemin (122) | <i>Smenospongia</i> sp. | Shore of Soheuksan Island, Korea            | 430 | C <sub>27</sub> H <sub>42</sub> O <sub>4</sub> | [54] |
| 12-Deacetoxy-23-aldehydeheteronemin (123)              | <i>Smenospongia</i> sp. | Shore of Soheuksan Island, Korea            | 500 | C <sub>30</sub> H <sub>44</sub> O <sub>6</sub> | [54] |
| 12-Deacetoxy-23-deacetoxy-scalarin (124)               | <i>Smenospongia</i> sp. | Gageo Island, South Korea                   | 402 | C <sub>25</sub> H <sub>38</sub> O <sub>4</sub> | [53] |
| 12-Deacetoxy-23-hydroxyscalar-furan (125)              | <i>Smenospongia</i> sp. | Shore of Soheuksan Island, Korea            | 370 | C <sub>25</sub> H <sub>38</sub> O <sub>2</sub> | [54] |
| 12-Deacetoxy-23-acetoxyscalar-furan (126)              | <i>Smenospongia</i> sp. | Shore of Soheuksan Island, Korea            | 412 | C <sub>27</sub> H <sub>40</sub> O <sub>3</sub> | [54] |
| 18S-12-deacetoxy-23-acetoxy-20-carboxyscaladial (127)  | <i>Smenospongia</i> sp. | Shore of Soheuksan Island, Korea            | 444 | C <sub>27</sub> H <sub>40</sub> O <sub>5</sub> | [54] |
| 18S-12-deacetoxy-23-acetoxy-20-methoxyscaladial (128)  | <i>Smenospongia</i> sp. | Shore of Soheuksan Island, Korea            | 458 | C <sub>28</sub> H <sub>42</sub> O <sub>5</sub> | [54] |
| 18R-12-deacetoxy-23-acetoxy-20-methoxyscaladial (129)  | <i>Smenospongia</i> sp. | Shore of Soheuksan Island, Korea            | 458 | C <sub>28</sub> H <sub>42</sub> O <sub>5</sub> | [54] |

**Table S7.** Chromene derivatives reported from genus *Smenospongia*.

| Compound Name         | Source                  | Place                      | Mol. Wt. | Mol. Formula                                   | Ref. |
|-----------------------|-------------------------|----------------------------|----------|------------------------------------------------|------|
| Smenochromene A (130) | <i>Smenospongia</i> sp. | Therese Island, Seychelles | 338      | C <sub>22</sub> H <sub>26</sub> O <sub>3</sub> | [55] |
| Smenochromene B (131) | <i>Smenospongia</i> sp. | Therese Island, Seychelles | 338      | C <sub>22</sub> H <sub>26</sub> O <sub>3</sub> | [55] |
| Smenochromene C (132) | <i>Smenospongia</i> sp. | Therese Island, Seychelles | 340      | C <sub>22</sub> H <sub>28</sub> O <sub>3</sub> | [55] |
| Smenochromene D (133) | <i>Smenospongia</i> sp. | Therese Island, Seychelles | 340      | C <sub>22</sub> H <sub>28</sub> O <sub>3</sub> | [55] |

**Table S8.**  $\gamma$ -Pyrone, phenyl alkenes, and naphthoquinones derivatives reported from genus *Smenospongia*.

| Compound Name                                                                                           | Source                                     | Place                                  | Mol. Wt. | Mol. Formula                                   | Ref. |
|---------------------------------------------------------------------------------------------------------|--------------------------------------------|----------------------------------------|----------|------------------------------------------------|------|
| $\gamma$ -Pyrone derivatives                                                                            |                                            |                                        |          |                                                |      |
| Smenopyrone (134)                                                                                       | <i>S. aurea</i>                            | coast of Great Inagua, Bahamas Islands | 418      | C <sub>25</sub> H <sub>38</sub> O <sub>5</sub> | [57] |
| Phenyl alkene derivatives                                                                               |                                            |                                        |          |                                                |      |
| ( <i>E</i> )-10-benzyl-5,7-dimethylundeca-1,5,10-trien-4-ol (135)                                       | <i>S. aurea</i><br><i>S. cerebriformis</i> | Florida Keys, USA                      | 284      | C <sub>20</sub> H <sub>28</sub> O              | [60] |
| Phenolics                                                                                               |                                            |                                        |          |                                                |      |
| ( <i>E</i> )-2,4-Dimethoxy-6-(3-methyl-5-(1,2,6-trimethylcyclohex-2-en-1-yl)pent-2-en-1-yl)phenol (136) | <i>S. echina</i>                           | Puerto Morelos, Mexico                 | 358      | C <sub>23</sub> H <sub>34</sub> O <sub>3</sub> | [15] |
| Naphthoquinones                                                                                         |                                            |                                        |          |                                                |      |
| Smenocerone A (137)                                                                                     | <i>S. cerebriformis</i>                    | Sea of Quangtri, Vietnam               | 278      | C <sub>14</sub> H <sub>14</sub> O <sub>6</sub> | [51] |
| Smenocerone B (138)                                                                                     | <i>S. cerebriformis</i>                    | Sea of Quangtri, Vietnam               | 308      | C <sub>15</sub> H <sub>16</sub> O <sub>7</sub> | [51] |

**Table S9.** Fatty acids, sterols, and phthalates reported from genus *Smenospongia*.

| Compound Name                               | Source                  | Place                                            | Mol. Wt. | Mol. Formula                                   | Ref. |
|---------------------------------------------|-------------------------|--------------------------------------------------|----------|------------------------------------------------|------|
| Fatty Acids                                 |                         |                                                  |          |                                                |      |
| 2-Hydroxy-17-methyloctadecanoic acid (139)  | <i>S. aurea</i>         | Shelf edge of La Parguera, Puerto Rico           | 314      | C <sub>19</sub> H <sub>38</sub> O <sub>3</sub> | [61] |
| 2-Hydroxy-21-methyldocosanoic acid (140)    | <i>S. aurea</i>         | Shelf edge of La Parguera, Puerto Rico           | 370      | C <sub>23</sub> H <sub>46</sub> O <sub>3</sub> | [61] |
| 2-Hydroxy-22-methyltricosanoic acid (141)   | <i>S. aurea</i>         | Shelf edge of La Parguera, Puerto Rico           | 384      | C <sub>24</sub> H <sub>48</sub> O <sub>3</sub> | [61] |
| 2-Hydroxy-22-methyltetracosanoic acid (142) | <i>S. aurea</i>         | Shelf edge of La Parguera, Puerto Rico           | 398      | C <sub>25</sub> H <sub>50</sub> O <sub>3</sub> | [61] |
| 2-Hydroxy-24-methylpentacosanoic acid (143) | <i>S. aurea</i>         | Shelf edge of La Parguera, Puerto Rico           | 412      | C <sub>26</sub> H <sub>52</sub> O <sub>3</sub> | [61] |
| 2-Hydroxy-23-methylpentacosanoic acid (144) | <i>S. aurea</i>         | Shelf edge of La Parguera, Puerto Rico           | 412      | C <sub>26</sub> H <sub>52</sub> O <sub>3</sub> | [61] |
| Linoleic acid (145)                         | <i>Smenospongia</i> sp. | El-Gouna, Hurghada-coasts, Red Sea, Egypt        | 280      | C <sub>18</sub> H <sub>32</sub> O <sub>2</sub> | [62] |
| Sterols                                     |                         |                                                  |          |                                                |      |
| $\beta$ -Sitosterol (146)                   | <i>Smenospongia</i> sp. | El-Gouna, Hurghada-coasts, Red Sea, Egypt        | 414      | C <sub>29</sub> H <sub>50</sub> O              | [62] |
| Cholesterol (147)                           | <i>Smenospongia</i> sp. | El-Gouna, Hurghada-coasts, Red Sea, Egypt        | 416      | C <sub>29</sub> H <sub>52</sub> O              | [62] |
| Ergosterol (148)                            | <i>Smenospongia</i> sp. | PP Island, Andaman Sea, Krabi province, Thailand | 396      | C <sub>28</sub> H <sub>44</sub> O              | [14] |

|                                                 |                         |                                           |     |                                                |      |
|-------------------------------------------------|-------------------------|-------------------------------------------|-----|------------------------------------------------|------|
| 24-Methylcholesta-5,22-dien-3 $\beta$ -ol (149) | <i>S. aurea</i>         | Shelf edge of La Parguera, Puerto Rica    | 398 | C <sub>28</sub> H <sub>46</sub> O              | [61] |
| 24-Methyl-cholest-5-en-3 $\beta$ -ol (150)      | <i>S. aurea</i>         | Shelf edge of La Parguera, Puerto Rica    | 400 | C <sub>28</sub> H <sub>48</sub> O              | [61] |
| 24-Ethylcholesta-5,22-dien-3 $\beta$ -ol (151)  | <i>S. aurea</i>         | Shelf edge of La Parguera, Puerto Rica    | 412 | C <sub>29</sub> H <sub>48</sub> O              | [61] |
| 24-Ethylcholest-5-en-3 $\beta$ -ol (152)        | <i>S. aurea</i>         | Shelf edge of La Parguera, Puerto Rica    | 414 | C <sub>29</sub> H <sub>50</sub> O              | [61] |
| Phthalates                                      |                         |                                           |     |                                                |      |
| Di-isobutyl phthalate (153)                     | <i>Smenospongia</i> sp. | El-Gouna, Hurghada-coasts, Red Sea, Egypt | 278 | C <sub>16</sub> H <sub>22</sub> O <sub>4</sub> | [62] |
| Di- <i>n</i> -butyl phthalate (154)             | <i>Smenospongia</i> sp. | El-Gouna, Hurghada-coasts, Red Sea, Egypt | 278 | C <sub>16</sub> H <sub>22</sub> O <sub>4</sub> | [62] |

## References

- Ibrahim, S.R.; Mohamed, G.A. Marine pyridoacridine alkaloids: Biosynthesis and biological activities. *Chem. Biodiv.* **2016**, *13*, 37–47.
- Ibrahim, S.R.; Fadil, S.A.; Fadil, H.A.; Hareeri, R.H.; Alolayan, S.O.; Abdallah, H.M.; Mohamed, G.A. *Dactylospongia elegans*—A promising drug source: Metabolites, bioactivities, biosynthesis, synthesis, and structural-activity relationship. *Mar. Drugs* **2022**, *20*, 221.
- Esposito, R.; Federico, S.; Bertolino, M.; Zupo, V.; Costantini, M. Marine Demospongiae: A challenging treasure of bioactive compounds. *Mar. Drugs* **2022**, *20*, 244.
- Perdicaris, S.; Vlachogianni, T.; Valavanidis, A. Bioactive natural substances from marine sponges: New developments and prospects for future pharmaceuticals. *Nat. Prod. Chem. Res.* **2013**, *1*, 1–8.
- Pawlik, J.R.; McMurray, S.E. The emerging ecological and biogeochemical importance of sponges on coral reefs. *Ann. Rev. Mar. Sci.* **2020**, *12*, 315–337.
- Maslin, M.; Gaertner-Mazouni, N.; Debitus, C.; Joy, N.; Ho, R. Marine sponge aquaculture towards drug development: An ongoing history of technical, ecological, chemical considerations and challenges. *Aquacult. Rep.* **2021**, *21*, 100813.
- Aguila-Ramírez, R.N.; Hernández-Guerrero, C.J.; González-Acosta, B.; Id-Daoud, G.; Hewitt, S.; Pope, J.; Hellio, C. Antifouling activity of symbiotic bacteria from sponge *Aplysina gerardogreeni*. *Int. Biodeterior. Biodegrad.* **2014**, *90*, 64–70.
- Ibrahim, S.R.; Edrada-Ebel, R.; Mohamed, G.A.; Youssef, D.T.; Wray, V.; Proksch, P. Callyaerin G, a new cytotoxic cyclic peptide from the marine sponge *Callyspongia aerizusa*. *Arkivoc* **2008**, *12*, 164–171.
- Ibrahim, S.R.; Min, C.C.; Teuscher, F.; Ebel, R.; Kakoschke, C.; Lin, W.; Wray, V.; Edrada-Ebel, R.; Proksch, P. Callyaerins A–F and H, new cytotoxic cyclic peptides from the Indonesian marine sponge *Callyspongia aerizusa*. *Bioorg. Med. Chem.* **2010**, *18*, 4947–4956.
- Ibrahim, S.R.; Mohamed, G.A.; Zayed, M.F.; Sayed, H.M. Ingenines A and B. Two new alkaloids from the Indonesian sponge *Acanthostrongylophora ingens*. *Drug Res.* **2015**, *65*, 361–365.
- Ibrahim, S.R.; Mohamed, G.A. Ingenines C and D, new cytotoxic pyrimidine- $\beta$ -carboline alkaloids from the Indonesian sponge *Acanthostrongylophora ingens*. *Phytochem. Lett.* **2016**, *18*, 168–171.
- Ibrahim, S.R.; Mohamed, G.A. Pyridoacridine alkaloids from deep-water marine organisms: Structural elucidation. *Bull. Fac. Pharm. Cairo Univ.* **2016**, *54*, 107–135.
- Sim, C.J.; Lee, K.J.; Kim, Y.A. twelve new species of two genera *Smenospongia* and *Cacospongia* (Demospongia: Dictyoceratida: Thorectidae) from Korea. *J. Spec. Res.* **2016**, *5*, 31–48.
- McKay, M.J.; Carroll, A.R.; Quinn, R.J.; Hooper, J.N. 1,2-Bis (1*H*-indol-3-yl) ethane-1,2-dione, an indole alkaloid from the marine sponge *Smenospongia* sp. *J. Nat. Prod.* **2002**, *65*, 595–597.

15. Hang, D.T.T.; Nhiem, N.X.; Tai, B.H.; Anh, H.L.T.; Yen, P.H.; Van Dau, N.; Van Minh, C.; Van Kiem, P. Merosesquiterpenes from marine sponge *Smenospongia Cerebriformis*. *Vietnam J. Chem.* **2017**, *55*, 153.
16. Hu, J.; Schetz, J.A.; Kelly, M.; Peng, J.; Ang, K.K.; Flotow, H.; Leong, C.Y.; Ng, S.B.; Buss, A.D.; Wilkins, S.P. New antiinfective and human 5-HT<sub>2</sub> receptor binding natural and semisynthetic compounds from the Jamaican sponge *Smenospongia aurea*. *J. Nat. Prod.* **2002**, *65*, 476–480.
17. Prawat, H.; Mahidol, C.; Kawetripob, W.; Wittayalai, S.; Ruchirawat, S. Iodo-sesquiterpene hydroquinone and brominated indole alkaloids from the Thai sponge *Smenospongia* sp. *Tetrahedron* **2012**, *68*, 6881–6886.
18. Djura, P.; Stierle, D.B.; Sullivan, B.; Faulkner, D.J.; Arnold, E.V.; Clardy, J. Some metabolites of the marine sponges *Smenospongia aurea* and *Smenospongia* (Ident. *Polyfibrospongia*) *echina*. *J. Org. Chem.* **1980**, *45*, 1435–1441.
19. Tymiak, A.A.; Rinehart Jr, K.L.; Bakus, G.J. Constituents of morphologically similar sponges: *Aplysina* and *Smenospongia* species. *Tetrahedron* **1985**, *41*, 1039–1047.
20. Tasdemir, D.; Bugni, T.S.; Mangalindan, G.C.; Concepción, G.P.; Harper, M.K.; Ireland, C.M. Cytotoxic bromoindole derivatives and terpenes from the Philippine marine sponge *Smenospongia* sp. *Z. Naturforsch. C* **2002**, *57*, 914–922.
21. Teta, R.; Della Sala, G.; Esposito, G.; Via, C.W.; Mazzocchi, C.; Piccoli, C.; Bertin, M.J.; Costantino, V.; Mangoni, A. A joint molecular networking study of a *Smenospongia* sponge and a cyanobacterial bloom revealed new antiproliferative chlorinated polyketides. *Org. Chem. Front.* **2019**, *6*, 1762–1774.
22. Aiello, A.; Fattorusso, E.; Menna, M. A new antibiotic chloro-sesquiterpene from the Caribbean sponge *Smenospongia aurea*. *Z. Naturforsch. B* **1993**, *48*, 209–212.
23. Esposito, G.; Della Sala, G.; Teta, R.; Caso, A.; Bourguet-Kondracki, M.; Pawlik, J.R.; Mangoni, A.; Costantino, V. chlorinated thiazole-containing polyketide-peptides from the Caribbean sponge *Smenospongia conulosa*: Structure elucidation on microgram scale. *Eur. J. Org. Chem.* **2016**, *2016*, 2871–2875.
24. Shen, Y.; Liaw, C.; Ho, J.; Khalil, A.T.; Kuo, Y. Isolation of aureol from *Smenospongia* sp. and cytotoxic activity of some aureol derivatives. *Nat. Prod. Res.* **2006**, *20*, 578–585.
25. Venkateswarlu, Y.; Faulkner, D.J.; Steiner, J.L.R.; Corcoran, E.; Clardy, J. Smenochromenes, unusual macrocyclic sesquiterpene hydroquinone derivatives from a Seychelles sponge of the genus *Smenospongia*. *J. Org. Chem.* **1991**, *56*, 6271–6274.
26. Kondracki, M.; Guyot, M. Biologically active quinone and hydroquinone sesquiterpenoids from the sponge *Smenospongia* sp. *Tetrahedron* **1989**, *45*, 1995–2004.
27. Van Kiem, P.; Hang, D.T.; Nhiem, N.X.; Tai, B.H.; Anh, H.L.T.; Van Cuong, P.; Quang, T.H.; Van Minh, C.; Van Dau, N.; Kim, Y. Sesquiterpene derivatives from marine sponge *Smenospongia cerebriformis* and their anti-inflammatory activity. *Bioorg. Med. Chem. Lett.* **2017**, *27*, 1525–1529.
28. Hang, D.T.T.; Nhiem, N.X.; Tai, B.H.; Anh, H.L.T.; Yen, P.H.; Van Dau, N.; Van Minh, C.; Van Kiem, P. Sesquiterpene phenols from marine sponge *Smenospongia cerebriformis*. *Vietnam J. Chem.* **2017**, *55*, 148.
29. Bourguet-Kondracki, M.; Guyot, M. A new sesquiterpene tetronic acid derivative from the marine sponge *Smenospongia* sp. *Tetrahedron Lett.* **1999**, *40*, 3149–3150.
30. Kwak, C.; Jin, L.; Han, J.H.; Han, C.W.; Kim, E.; Cho, M.; Chung, T.; Bae, S.; Jang, S.B.; Ha, K. Ilimaquinone induces the apoptotic cell death of cancer cells by reducing pyruvate dehydrogenase kinase 1 activity. *Int. J. Mol. Sci.* **2020**, *21*, 6021.
31. Hwang, I.H.; Oh, J.; Zhou, W.; Park, S.; Kim, J.; Chittiboyina, A.G.; Ferreira, D.; Song, G.Y.; Oh, S.; Na, M. Cytotoxic activity of rearranged drimane meroterpenoids against colon cancer cells via down-regulation of  $\beta$ -catenin expression. *J. Nat. Prod.* **2015**, *78*, 453–461.
32. Bourguet-Kondracki, M.; Martin, M.; Guyot, M. Smenoqualone a novel sesquiterpenoid from the marine sponge *Smenospongia* sp. *Tetrahedron Lett.* **1992**, *33*, 8079–8080.
33. Huyen, L.T.; Hang, D.T.; Nhiem, N.X.; Tai, B.H.; Anh, H.L.T.; Quang, T.H.; Yen, P.H.; Van Minh, C.; Van Dau, N.; Van Kiem, P. Sesquiterpene quinones and diterpenes from *Smenospongia cerebriformis* and their cytotoxic activity. *Nat. Prod. Commun.* **2017**, *12*, 1934578X1701200402.
34. Kochanowska, A.J.; Rao, K.V.; Childress, S.; El-Alfy, A.; Matsumoto, R.R.; Kelly, M.; Stewart, G.S.; Sufka, K.J.; Hamann, M.T. Secondary metabolites from three Florida sponges with antidepressant activity. *J. Nat. Prod.* **2008**, *71*, 186–189.
35. Kobayashi, J.; Murayama, T.; Ishibashi, M.; Kosuge, S.; Takamatsu, M.; Ohizumi, Y.; Kobayashi, H.; Ohta, T.; Nozoe, S.; Takuma, S. Hyrtiosins A and B, new indole alkaloids from the okinawan marine sponge *Hyrtios erecta*. *Tetrahedron* **1990**, *46*, 7699–7702.
36. Swain, S.P.; Mohanty, S. Imidazolidinones and imidazolidine-2,4-diones as antiviral agents. *ChemMedChem* **2019**, *14*, 291–302.
37. Dai, J.; Jiménez, J.I.; Kelly, M.; Barnes, S.; Lorenzo, P.; Williams, P. Dictazolines A and B, bispiroimidazolidinones from the marine sponge *Smenospongia cerebriformis*. *J. Nat. Prod.* **2008**, *71*, 1287–1290.
38. Hwang, I.H.; Oh, J.; Kochanowska-Karamyan, A.; Doerksen, R.J.; Na, M.; Hamann, M.T. A novel natural phenyl alkene with cytotoxic activity. *Tetrahedron Lett.* **2013**, *54*, 3872–3876.
39. Le, T.H.; Hang, D.T.T.; Nhiem, N.X.; Yen, P.H.; Anh, H.L.T.; Quang, T.H.; Tai, B.H.; Van Dau, N.; Van Kiem, P. Naphthoquinones and sesquiterpene cyclopentenones from the sponge *Smenospongia cerebriformis* with their cytotoxic activity. *Chem. Pharm. Bull.* **2017**, *65*, 589–592.



40. Caso, A.; Mangoni, A.; Piccialli, G.; Costantino, V.; Piccialli, V. Studies toward the synthesis of smenamide a, an antiproliferative metabolite from *smenospongia aurea*: Total synthesis of ent-smenamide A and 16-epi-smenamide A. *Acs Omega* **2017**, *2*, 1477–1488.
41. Esposito, G.; Teta, R.; Della Sala, G.; Pawlik, J.R.; Mangoni, A.; Costantino, V. Isolation of smenopyrone, a bis- $\gamma$ -pyrone polypropionate from the Caribbean sponge *Smenospongia aurea*. *Mar. Drugs* **2018**, *16*, 285.
42. Caso, A.; Laurenzana, I.; Lamorte, D.; Trino, S.; Esposito, G.; Piccialli, V.; Costantino, V. Smenamide A analogues. synthesis and biological activity on multiple myeloma cells. *Mar. Drugs* **2018**, *16*, 206.
43. Via, C.W.; Glukhov, E.; Costa, S.; Zimba, P.V.; Moeller, P.D.; Gerwick, W.H.; Bertin, M.J. The metabolome of a cyanobacterial bloom visualized by MS/MS-based molecular networking reveals new neurotoxic smenamide analogs (C. D. and E). *Front. Chem.* **2018**, *6*, 316.
44. Song, J.; Jeong, W.; Wang, N.; Lee, H.; Sim, C.J.; Oh, K.; Shin, J. Scalarane sesterterpenes from the sponge *Smenospongia* sp. *J. Nat. Prod.* **2008**, *71*, 1866–1871.
45. Wang, J.; Li, H.; Wang, M.; Wang, J.; Wu, Y. A six-step synthetic approach to marine natural product (-)-aureol. *Tetrahedron Lett.* **2018**, *59*, 945–948.
46. Hwang, B.; Rho, J. Scalaran-type sesterterpenes from a marine sponge *Smenospongia* species showing the AMPK activation. *J. Korean Magn. Reson. Soc.* **2012**, *16*, 1–10.
47. Teta, R.; Irollo, E.; Della Sala, G.; Pirozzi, G.; Mangoni, A.; Costantino, V. Smenamides A and B, chlorinated peptide/polyketide hybrids containing a dolapyrrolidinone unit from the Caribbean sponge *Smenospongia aurea*. evaluation of their role as leads in antitumor drug research. *Mar. Drugs* **2013**, *11*, 4451–4463.
48. Esposito, G.; Teta, R.; Miceli, R.; Ceccarelli, L.S.; Della Sala, G.; Camerlingo, R.; Irollo, E.; Mangoni, A.; Pirozzi, G.; Costantino, V. Isolation and assessment of the in vitro anti-tumor activity of smenothiazole A and B, chlorinated thiazole-containing peptide/polyketides from the Caribbean sponge, *Smenospongia aurea*. *Mar. Drugs* **2015**, *13*, 444–459.
49. Rho, J.; Lee, H.; Shin, H.J.; Ahn, J.; Kim, J.; Sim, C.J.; Shin, J. New sesterterpenes from the sponge *Smenospongia* sp. *J. Nat. Prod.* **2004**, *67*, 1748–1751.
50. Wright, A.E.; Rueth, S.A.; Cross, S.S. An antiviral sesquiterpene hydroquinone from the marine sponge *Strongylophora hartmani*. *J. Nat. Prod.* **1991**, *54*, 1108–1111.
51. Carballeira, N.M.; Emiliano, A.; Rodriguez, J.; Reyes, E.D. Isolation and characterization of novel 2-hydroxy fatty acids from the phospholipids of the sponge *Smenospongia aurea*. *Lipids* **1992**, *27*, 681–685.
52. Shaaban, M.; Abd-Alla, H.I.; Hassan, A.Z.; Aly, H.F.; Ghani, M.A. Chemical characterization, antioxidant and inhibitory effects of some marine sponges against carbohydrate metabolizing enzymes. *Org. Med. Chem. Lett.* **2012**, *2*, 30.
53. Bialonska, D.; Zjawiony, J.K. Aplysinopsins-marine indole alkaloids: Chemistry, bioactivity and ecological significance. *Mar. Drugs* **2009**, *7*, 166–183.
54. Caso, A.; Esposito, G.; Della Sala, G.; Pawlik, J.R.; Teta, R.; Mangoni, A.; Costantino, V. Fast detection of two smenamide family members using molecular networking. *Mar. Drugs* **2019**, *17*, 618.
55. Kondracki, M.; Guyot, M. Smenospongine: A cytotoxic and antimicrobial aminoquinone isolated from *Smenospongia* sp. *Tetrahedron Lett.* **1987**, *28*, 5815–5818.
56. Do, M.T.; Na, M.; Kim, H.G.; Khanal, T.; Choi, J.H.; Jin, S.W.; Oh, S.H.; Hwang, I.H.; Chung, Y.C.; Kim, H.S. Ilimaquinone induces death receptor expression and sensitizes human colon cancer cells to trail-induced apoptosis through activation of ROS-ERK/p38 MAPK-CHOP signaling pathways. *Food Chem. Toxicol.* **2014**, *71*, 51–59.
57. Atas, E.; Oberhuber, M.; Kenner, L. The implications of PDK1–4 on tumor energy metabolism, aggressiveness and therapy resistance. *Front. Oncol.* **2020**, *10*, 583217.
58. Son, Y.; Lim, D.; Park, S.; Song, I.; Kim, J.; Shin, S.; Jang, H.; Liu, K.; Yuseok, O.; Song, G. Ilimaquinone inhibits neovascular age-related macular degeneration through modulation of Wnt/B-catenin and p53 pathways. *Pharmacol. Res.* **2020**, *161*, 105146.
59. López, M.D.; Quiñoá, E.; Riguera, R.; Omar, S. Dactyltronic acids from the sponge *Dactylospongia elegans*. *J. Nat. Prod.* **1994**, *57*, 992–996.
60. Rosa, C.P.; Kienzler, M.A.; Olson, B.S.; Liang, G.; Trauner, D. Total synthesis of smenochromene B through ring contraction. *Tetrahedron* **2007**, *63*, 6529–6534.
61. Lin, Z.; Torres, J.P.; Ammon, M.A.; Marett, L.; Teichert, R.W.; Reilly, C.A.; Kwan, J.C.; Huguen, R.W.; Flores, M.; Tianero, M.D. A bacterial source for mollusk pyrone polyketides. *Chem. Biol.* **2013**, *20*, 73–81.
62. Zhou, Z.; Li, X.; Yao, L.; Li, J.; Gavagnin, M.; Guo, Y. Marine bis- $\Gamma$ -pyrone polypropionates of onchidione family and their effects on the XBP1 gene expression. *Bioorg. Med. Chem. Lett.* **2018**, *28*, 1093–1096.
63. Segraves, N.L.; Crews, P. Investigation of brominated tryptophan alkaloids from two Thorectidae sponges: *Thorectandra* and *Smenospongia*. *J. Nat. Prod.* **2005**, *68*, 1484–1488.
64. Tsukamoto, S.; Kato, H.; Hirota, H.; Fusetani, N. Antifouling terpenes and steroids against barnacle larvae from marine sponges. *Biofouling* **1997**, *11*, 283–291.
